# Supplementary material for: Inverted triplications formed by iterative template switches generate structural variant diversity at genomic disorder loci
Source: PubMed Central journal article supplement — Cell Genom. 2024 Jun 21;4(7):100590. doi: 10.1016/j.xgen.2024.100590 (PMC11293582; doi:10.1016/j.xgen.2024.100590), 2024-06-21

**Supplemental information**

**Inverted triplications formed by iterative  
template switches generate structural variant  
diversity at genomic disorder *loci***

**Christopher M. Grochowski, Jesse D. Bengtsson, Haowei Du, Mira Gandhi, Ming Yin Lun, Michele G. Mehaffey, KyungHee Park, Wolfram Höps, Eva Benito, Patrick Hasenfeld, Jan O. Korb, Medhat Mahmoud, Luis F. Paulin, Shalini N. Jhangiani, James Paul Hwang, Sravya V. Bhamidipati, Donna M. Muzny, Jawid M. Fatih, Richard A. Gibbs, Matthew Pendleton, Eoghan Harrington, Sissel Juul, Anna Lindstrand, Fritz J. Sedlazeck, Davut Pehlivan, James R. Lupski, and Claudia M.B. Carvalho**

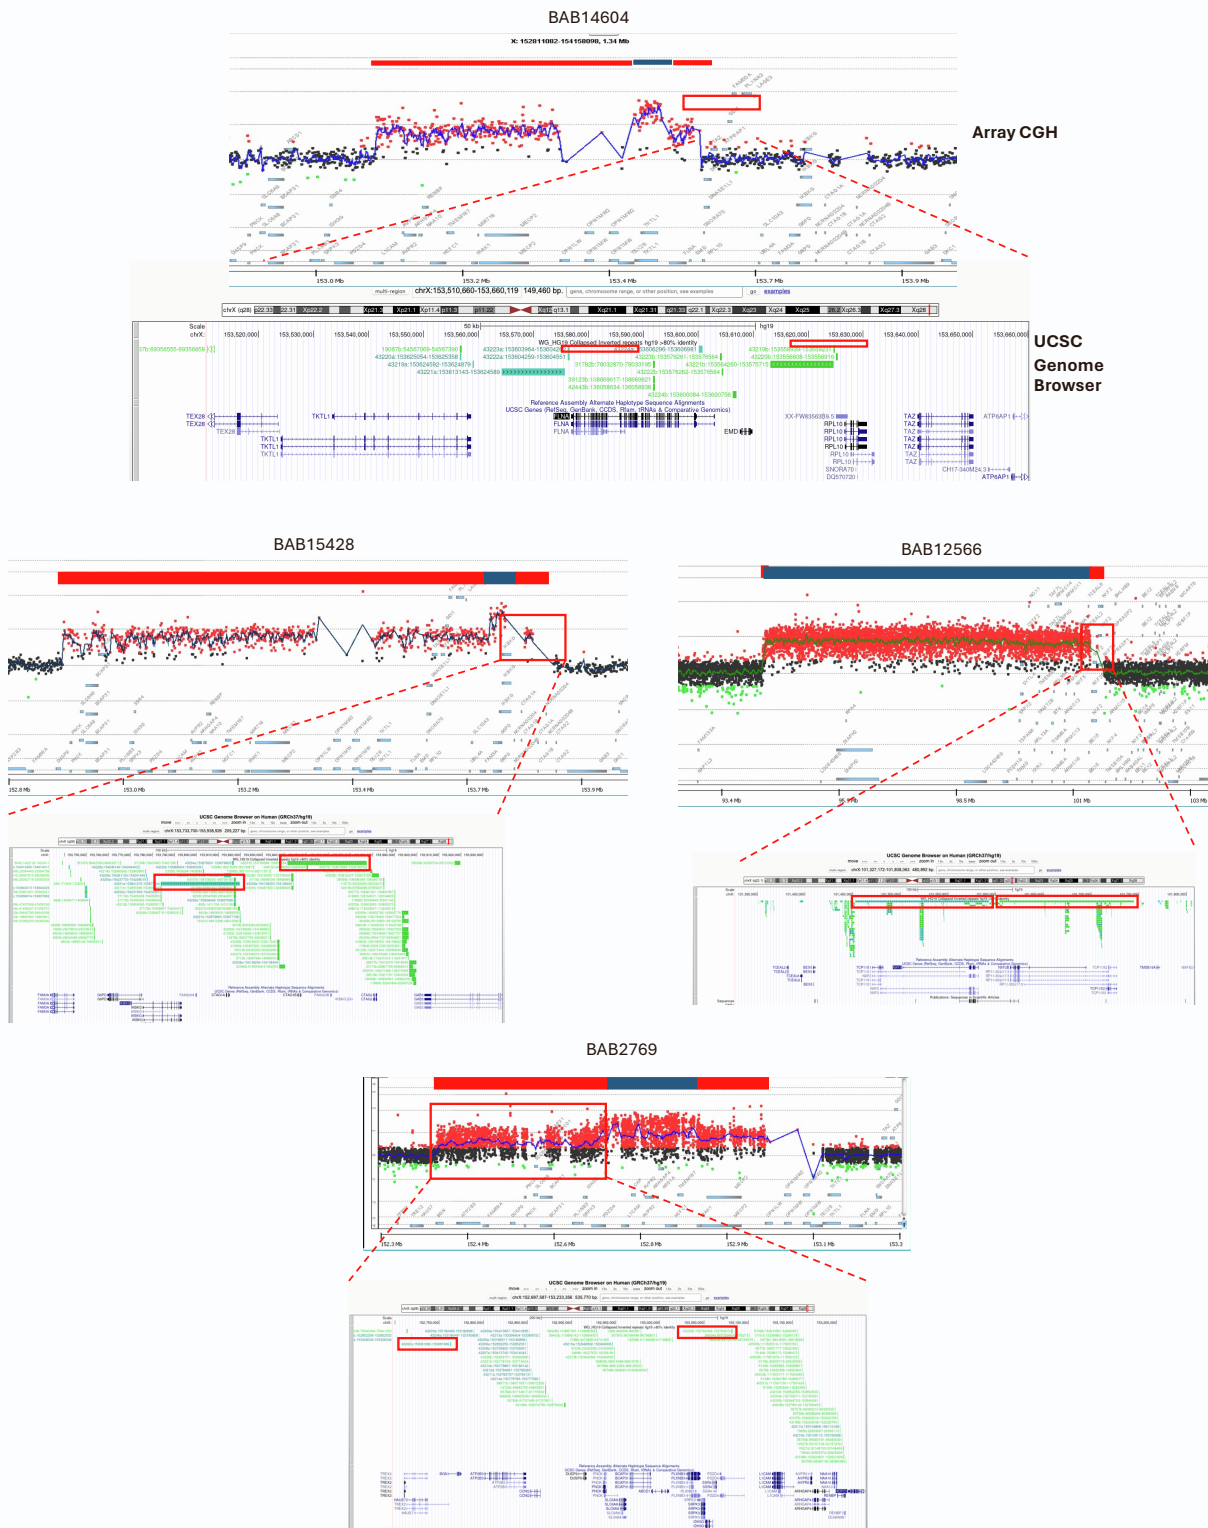

**Figure S1: Four pairs of inverted LCRs generating DUP-TRP/INV-DUP events, related to Figure 1. (43202a/43202a; 43221a/43221b (K1/K2); 43231a/43231b (L1/L2)) shown within the *MECP2* locus with the fourth pair being located at Xq22.1 (37696a/ 37696b). The corresponding location in the UCSC genome browser is shown.**

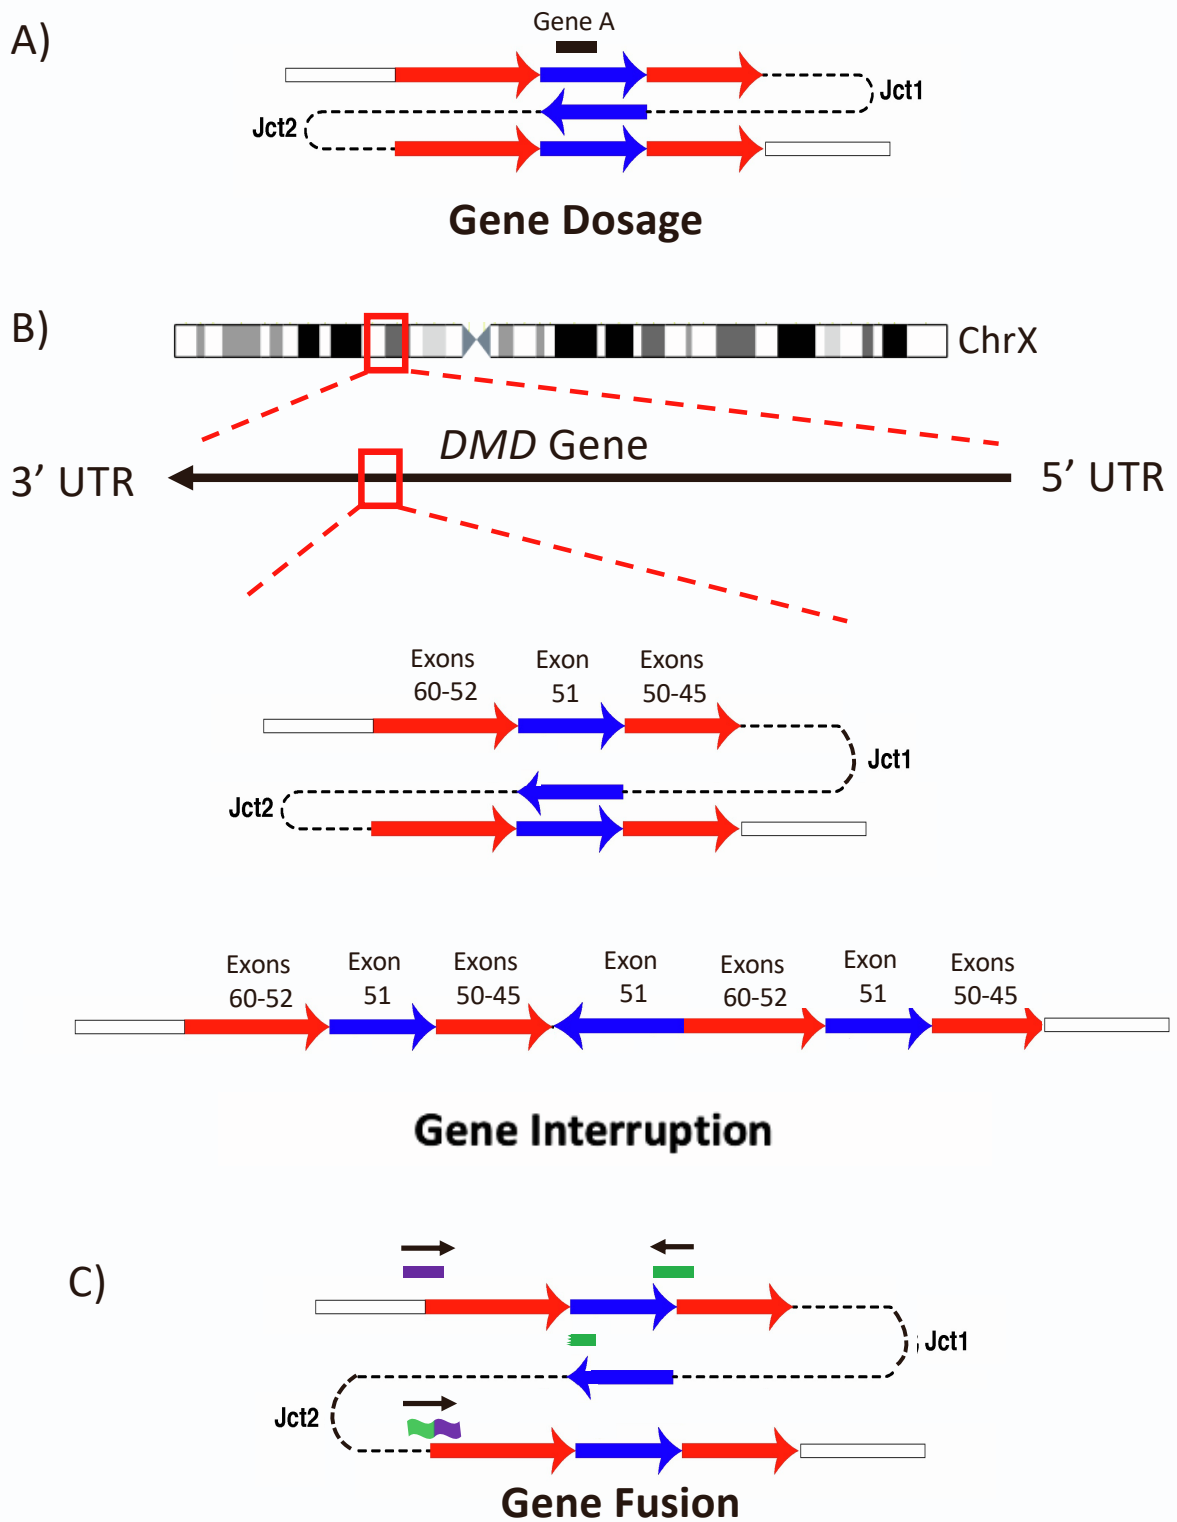

**Figure S2: Possible pathogenic effects of a DUP-TRP/INV-DUP event, related to Figure 1.** Events include gene dosage (A) gene interruption (B) as characterized by a disruption within the *DMD* gene<sup>24</sup> or gene fusion (C) events.

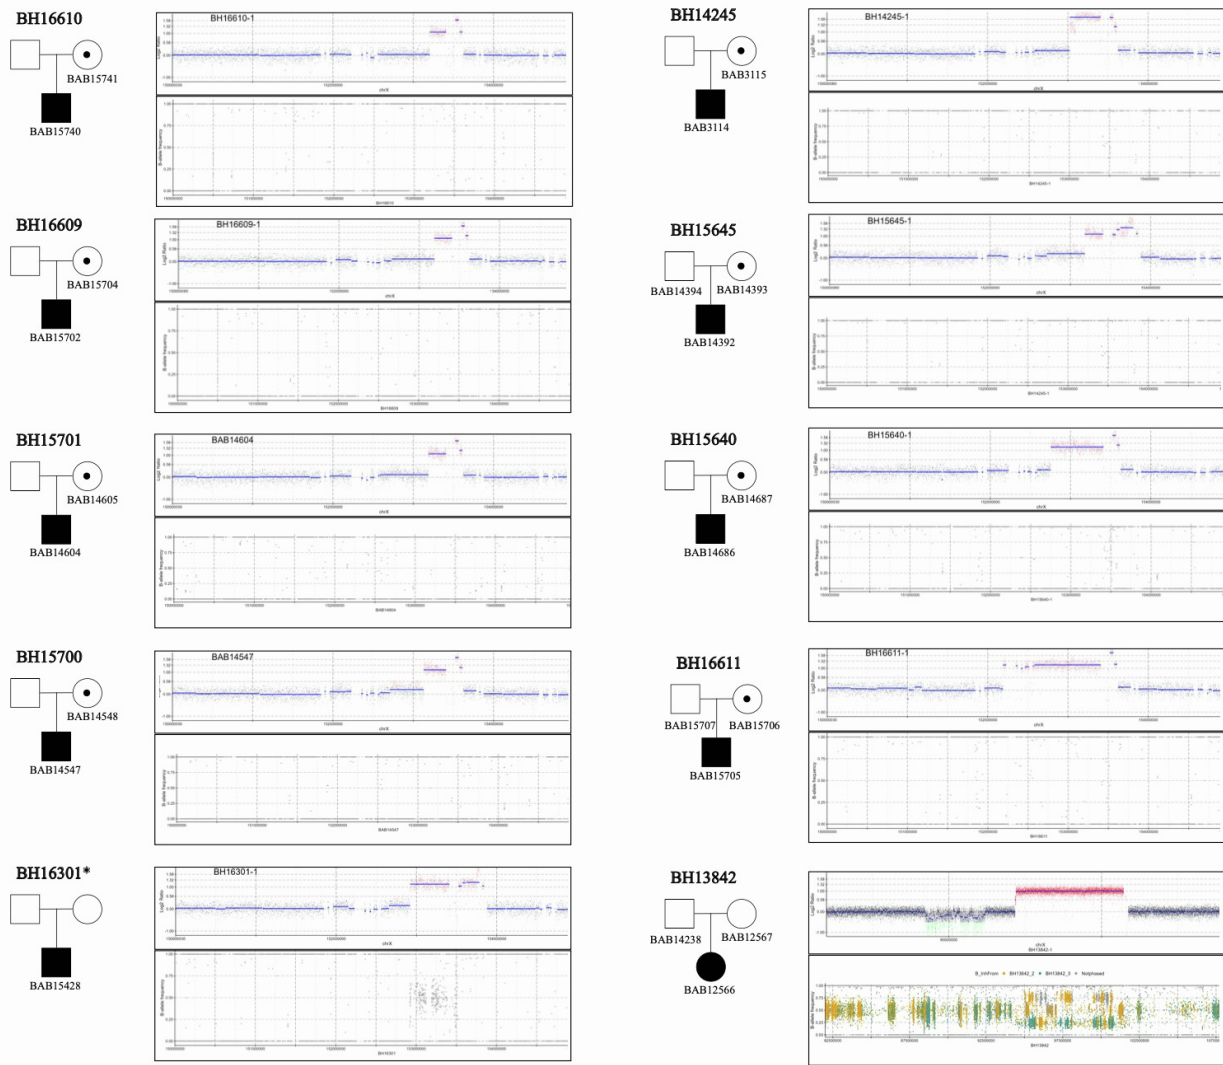

\*Parental samples not available - inheritance unknown

**Figure S3: VizCNV plots, Related to Table 1.** Showing each of the 10 individuals where short-read WGS was performed showing both the Log<sub>2</sub> ratio as well as the B-allele frequency.



| BABNumber | Duplication Start | Duplication End | DUP1 Size | Triplication Start | Triplication End | TRP Size | Duplication Start | Duplication End | DUP2 Size | Total Size |
|-----------|-------------------|-----------------|-----------|--------------------|------------------|----------|-------------------|-----------------|-----------|------------|
| BAB15789  | 152934679         | 153473892       | 539213    | 153505538          | 153562778        | 57240    | 153562880         | 153623000       | 60120     | 688321     |
| BAB15740  | 153206000         | 153504574       | 298574    | 153505538          | 153576037        | 70499    | 153576037         | 153623000       | 46963     | 417000     |
| BAB15705  | 152191064         | 153420198       | 1229134   | 153505485          | 153565901        | 60416    | 153576037         | 153623000       | 46963     | 1431936    |
| BAB15702  | 153190100         | 153504574       | 314474    | 153505538          | 153576037        | 70499    | 153576037         | 153623000       | 46963     | 432900     |
| BAB15428  | 152922014         | 153751734       | 829720    | 153752634          | 153783184        | 30550    | 153820217         | 153836222       | 16005     | 914208     |
| BAB15420  | 153000860         | 153352116       | 351256    | 153352787          | 153564086        | 211299   | 153576037         | 153623000       | 46963     | 622140     |
| BAB15418  | 153055212         | 153504574       | 449362    | 153523215          | 153576037        | 52822    | 153576037         | 153623000       | 46963     | 567788     |
| BAB14686  | 152754991         | 153420198       | 665207    | 153505538          | 153576037        | 70499    | 153576037         | 153623000       | 46963     | 868009     |
| BAB14604  | 153189231         | 153504574       | 315343    | 153505538          | 153565901        | 60363    | 153576037         | 153623000       | 46963     | 433769     |
| BAB14547  | 153130888         | 153504574       | 373686    | 153505538          | 153576037        | 70499    | 153576037         | 153623000       | 46963     | 492112     |
| BAB14392  | 153180328         | 153723986       | 543658    | 153723986          | 153783184        | 59198    | 153783184         | 153877318       | 94134     | 696990     |
| BAB12566  | 94346142          | 94393007        | 46865     | 94395899           | 101440936        | 7045037  | 101452290         | 101745566       | 293276    | 7399424    |
| BAB3274   | 153183739         | 153504574       | 320835    | 153505538          | 153576037        | 70499    | 153576037         | 153623000       | 46963     | 439261     |
| BAB3255   | 153074186         | 153374088       | 299902    | 153505538          | 153576037        | 70499    | 153576037         | 153623000       | 46963     | 548814     |
| BAB3216   | 152930997         | 153246726       | 315729    | 153246726          | 153254972        | 8246     | 153254972         | 153505637       | 250665    | 574640     |
| BAB3147   | 152850937         | 153353716       | 502779    | 153353716          | 153576037        | 222321   | 153576037         | 153623000       | 46963     | 772063     |
| BAB3114   | 153027282         | 153097982       | 70700     | 153097982          | 153576037        | 478055   | 153576037         | 153623000       | 46963     | 595718     |
| BAB2805   | 153015998         | 153108170       | 92172     | 153108170          | 153576037        | 467867   | 153576037         | 153623000       | 46963     | 607002     |
| BAB2801   | 152976275         | 153286528       | 310253    | 152938984          | 153576037        | 637053   | 153576037         | 153623000       | 46963     | 646725     |
| BAB2797   | 153027282         | 153045830       | 18548     | 153045830          | 153576037        | 530207   | 153576037         | 153623000       | 46963     | 595718     |
| BAB2796   | 153116401         | 153390414       | 274013    | 153390414          | 153576037        | 185623   | 153576037         | 153623000       | 46963     | 506599     |
| BAB2772   | 153167337         | 153504574       | 337237    | 153505538          | 153576037        | 70499    | 153576037         | 153623000       | 46963     | 455663     |
| BAB2769   | 152763385         | 153084246       | 320861    | 153084246          | 153276174        | 191928   | 152929368         | 153504559       | 575191    | 741174     |
| BAB2727   | 153183448         | 153505538       | 322090    | 153505538          | 153576037        | 70499    | 153576037         | 153623000       | 46963     | 439552     |

**Table S1: Genomic location and size of each genomic fragment in the DUP-TRP/INV-DUP structure for each individual within the cohort, related to Table 1.**  
*All coordinates are based on array positions in Hg19 genome reference.*

| Inverted Repeat (IR) Pair | Location IR1 (Hg19)      | Size IR1 (bp) | Location IR2 (Hg19)      | Size IR2 (bp) | Similarity | Distance (bp) |
|---------------------------|--------------------------|---------------|--------------------------|---------------|------------|---------------|
| 43202a/43202b             | chrX:152762349-152763274 | 926           | chrX:153081083-153081999 | 917           | 98.12      | 317810        |
| 43221a/43221b (K1/K2)     | chrX:153564261-153575715 | 11455         | chrX:153613144-153624589 | 11446         | 99.23      | 37614         |
| 43231a/43231b(L1/L2)      | chrX:153783687-153819654 | 35968         | chrX:153841277-153877244 | 35968         | 99.92      | 21624         |
| 37696a/37696b             | chrX:101452532-101593093 | 140562        | chrX:101603859-101744479 | 140621        | 99.89      | 10767         |

**Table S2: LCR summary table including the genomic location (Hg19) as well as nucleotide size (bp), distance between the inverted pair and similarity score (%) each of the 4 pairs identified in this cohort, related to Figure 1**

| Patient Identifier | Internal Identifier | ArrayCGH | Short-Read WGS | Oxford Nanopore | HiFi Sequencing | Optical Genome Mapping | Strand-Seq |
|--------------------|---------------------|----------|----------------|-----------------|-----------------|------------------------|------------|
| BAB15740           | BH16610_1           | X        | X              | N/A             | N/A             | X                      | N/A        |
| BAB15705           | BH16611_1           | X        | X              | N/A             | N/A             | X                      | N/A        |
| BAB15702           | BH16609_1           | X        | X              | N/A             | N/A             | X                      | N/A        |
| BAB15789           | N/A                 | X        | N/A            | X               | N/A             | X                      | N/A        |
| BAB15428           | BH16301_1           | X        | X              | N/A             | N/A             | X                      | N/A        |
| BAB15418           | BH16300_1           | X        | N/A            | N/A             | X               | X                      | N/A        |
| BAB15421*          | BH16299_2           | X        | N/A            | N/A             | X               | X                      | N/A        |
| BAB12566           | BH13842_1           | X        | X              | X               | X               | X                      | N/A        |
| BAB14686           | BH15640_1           | X        | X              | N/A             | X               | X                      | N/A        |
| BAB14604           | BH15701_1           | X        | X              | X               | X               | X                      | N/A        |
| BAB14547           | BH15700_1           | X        | X              | X               | X               | X                      | X          |
| BAB14392           | BH15645_1           | X        | X              | N/A             | X               | N/A                    | N/A        |
| BAB3274            | BH16112_1           | X        | N/A            | X               | X               | X                      | N/A        |
| BAB3255            | BH16108_1           | X        | N/A            | N/A             | X               | X                      | N/A        |
| BAB3216            | N/A                 | X        | N/A            | N/A             | N/A             | N/A                    | N/A        |
| BAB3147            | BH16111_1           | X        | N/A            | N/A             | X               | X                      | N/A        |
| BAB2805            | N/A                 | X        | N/A            | N/A             | N/A             | N/A                    | N/A        |
| BAB2801            | BH15649_1           | X        | N/A            | N/A             | X               | X                      | N/A        |
| BAB2797            | N/A                 | X        | N/A            | N/A             | N/A             | N/A                    | N/A        |
| BAB2796            | BH16110_1           | X        | N/A            | N/A             | X               | X                      | N/A        |
| BAB3114            | BH14245_1           | X        | X              | X               | X               | X                      | X          |
| BAB2772            | N/A                 | X        | N/A            | N/A             | N/A             | X                      | N/A        |
| BAB2769            | N/A                 | X        | N/A            | N/A             | N/A             | X                      | N/A        |
| BAB2727            | BH16106_1           | X        | N/A            | N/A             | X               | N/A                    | N/A        |

Table S3: Sequencing methodology that was performed on each sample within this cohort, related to Table 1

**Data S1: ArrayCGH showing the *MECP2* critical region, nucleotide-level resolution of junction 2 as well as resolved haplotype and OGM data for the region (where applicable) for each sample, related to Table 1.**

# BAB2727

## Breakpoint Junction 2:

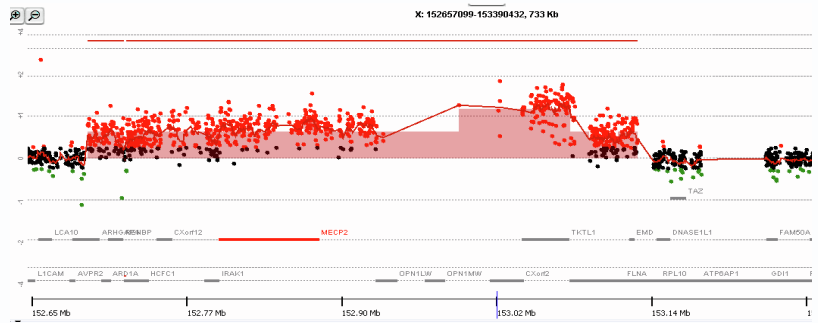

Distal\_reference\_TEX28B CTGTTTCCTCCGTCAGACTTTTCCTCCAAGTTGTGGGCCATGATTAGGCTCTAGCTCAATTTGCCAAA  
 BAB2727 CTGTTTCCTCCGTCAGACTTTTCCTCCAAGTTGTGGGCCAATGGCTCACACACAAATGTGTTTCAGGCC  
 Distal\_reference\_TEX28B (74 bp further ahead) CTCAGAAATGACCAAGAATATACTTTTCTGGCTGGCCCAATGGCTCACAC---CTGTAATCCAGC  
 Proximal\_reference\_intron\_ARHGAP4 .....TTTGACCGGCCGGTCCCTCCTTTGTGGTGTCTGTGGGTGTAACACCCCAATGTGTTTCAGGCC  
LINE-1 LINE-1

Haplotype Structure: *Not Available*

Adapted from Carvalho *et al.* <sup>16</sup>

# BAB2769

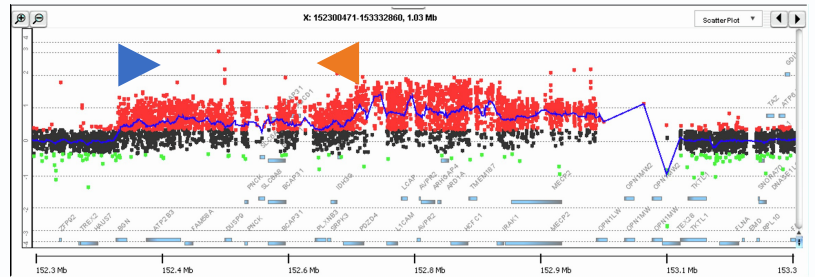

## Junction 2

DUPd (+) AACCCCGCAGGAAAGCCTGTGGGATCACTTCACACCCCTGTGACCTTAACCTTCACACCCCTGTGACCTTAAT  
 BAB2769 AACCCCGCTGGAGCCGGGCGCGGGCCCTAGGGCTTTCAGC-----AGGCCAG  
 TRPd (-) ACACCTGGCTGGAGCCGGGCGCGGGCCCTAGGGCTTTCAGCCTGTGTGATGGGTCTCTGCAGCAGGCCAG

## Junction 1

TRPd (-) TCTGTGGGCGGGAGÁ.....GGCTTTCACAGGG  
 BAB2769 TCTGTGGGCGGGAGA.....GGCTTCCCAAGG  
 DUPp (+) TCTGTGGGCGGGAGA.....GGCTTCCCAAGG

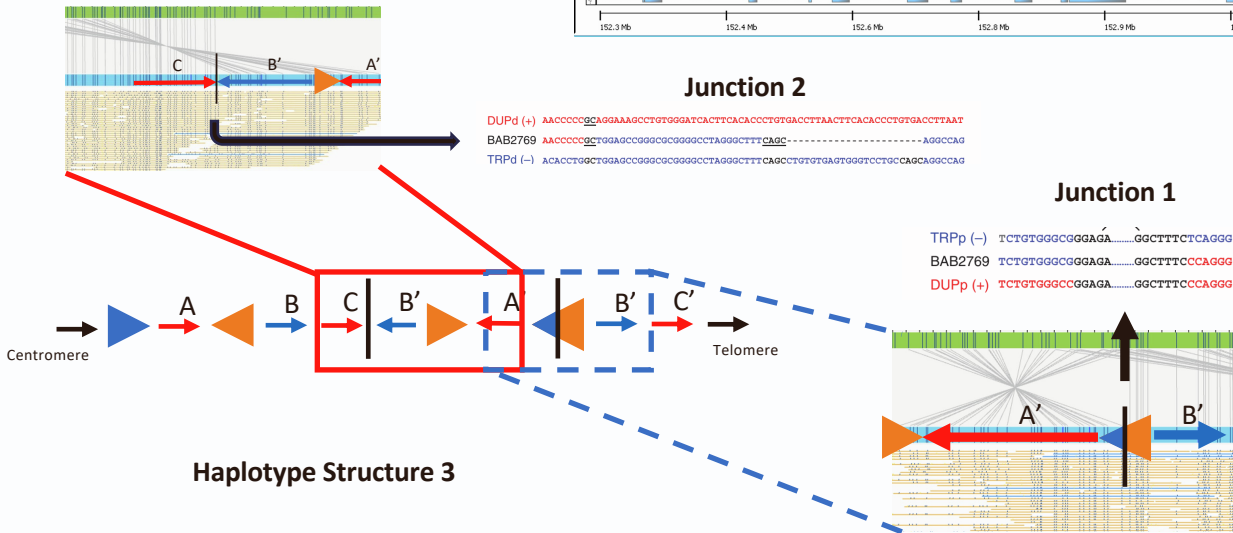

Adapted from Carvalho et al. <sup>5</sup>

# BAB2772

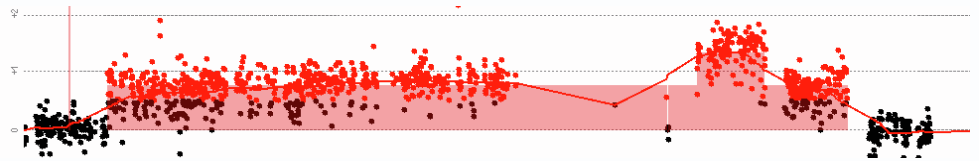

## Breakpoint Junction 2:

TRPp (-) GCCAGCCTGGTCTCAA  
 jct2 BAB2772 GCCAGCCTGGGGGAGGG  
 DUPp (+) GAGGTGTTGGGGGAGGG

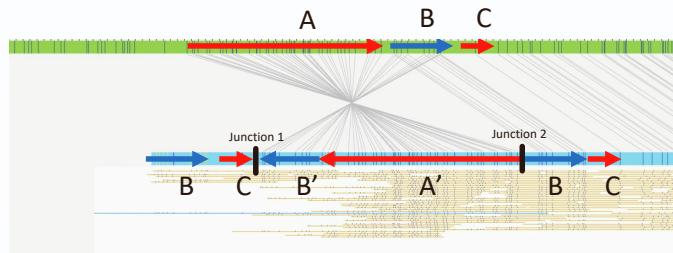

## Haplotype Structure 3:

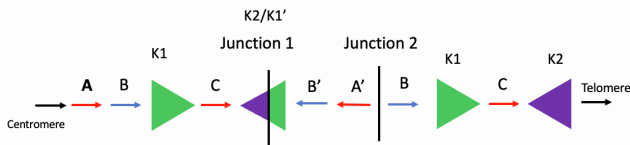

Adapted from Carvalho et al. <sup>5</sup>



# BAB2796

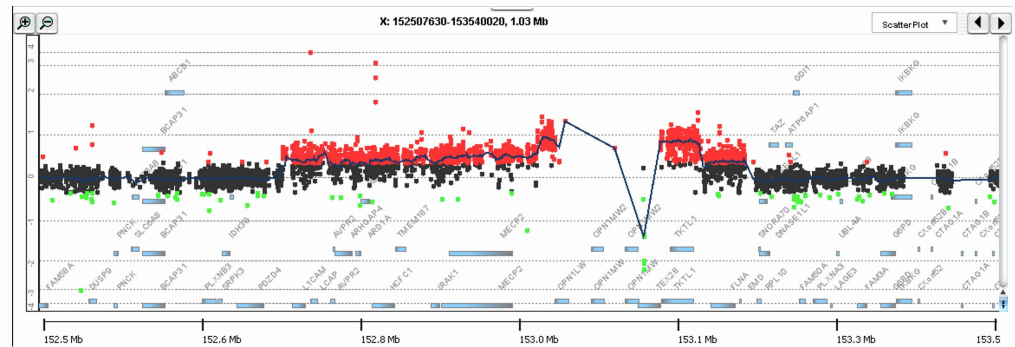

## Breakpoint Junction 2:

TRPp (-)      TCTCTTG--CCTCAGC  
 jct2 BAB2796/BAB2980 TCTCTTGAA**T**TATAAC  
 DUPp (+)      CTAATTC**T**TTATAAC

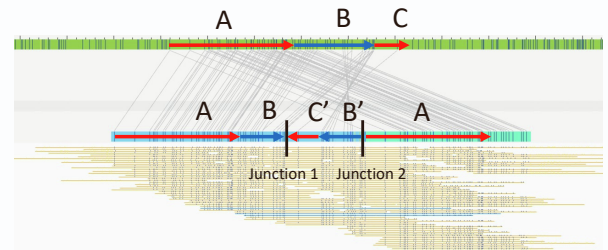

## Haplotype Structure 2

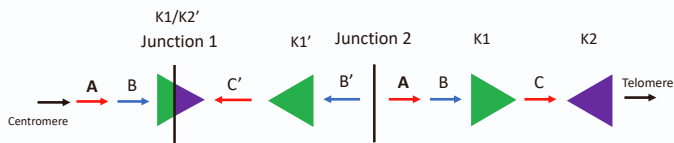

Adapted from Carvalho et al. <sup>5</sup>

# BAB2797

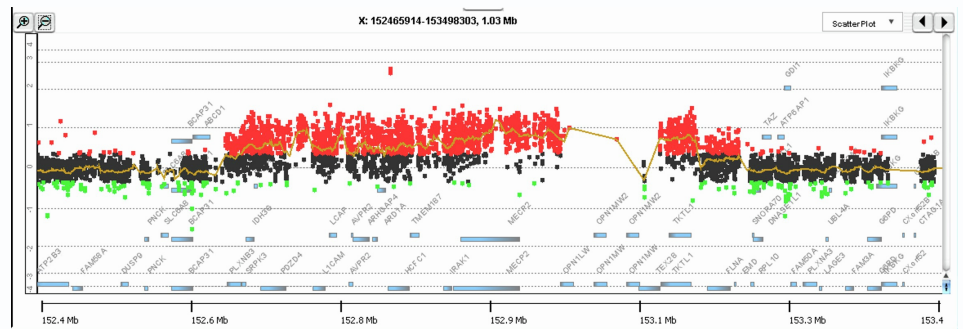

Breakpoint Junction 2:

TRPp (-) GCACAGGGCAGGATG  
jct2 BAB2797 GCACAGGATGTTTT  
DUPp (+) AAATCCATTGTTTT

Haplotype Structure: *Not Available*

Adapted from Carvalho et al. <sup>5</sup>

# BAB2801

## Breakpoint Junction 2:

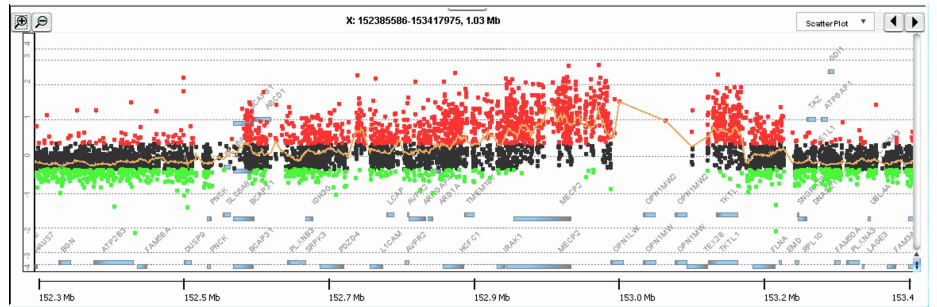

chrX:152955672

chrX:152955637 (+) TACTGTAGCCCCTCTTCAACACACTCAA**CCC****A****CCC****CCTCAAGACTCCACCTGGGGCCTGAGTCAGTGGCC**  
 Junction 2 **ATAGTTTCACTGTGTTCCACGCATTCAT**CCC****T****CCC****CCTCAAGACTCCACCTGGGGCCTGAGTCAGTGGCC****

chrX:153198729 (-) **ATAGTTTCACTGTGTTCCACGCATTCAT**CCC****T****CCC****TCTCCTTAACCCGTGGCAACCACTGATTTTTTACT****

chrX:153198702

## Haplotype Structure 4

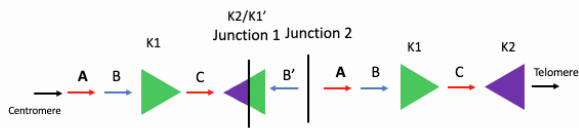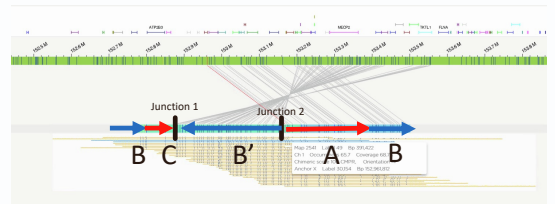

# BAB2805

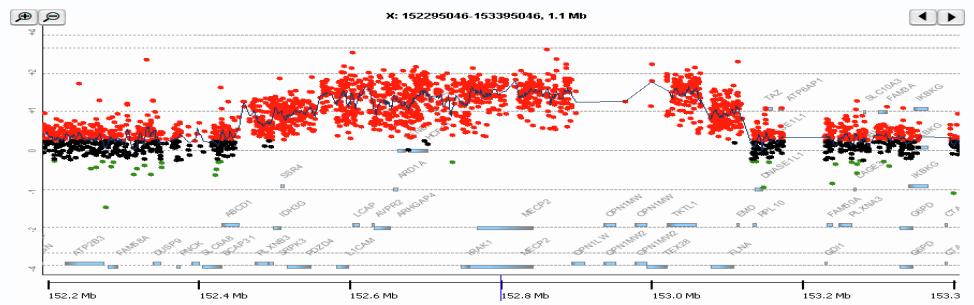

Breakpoint Junction 2:

```
TRPp (-) AACAGACAAAAAAGGCCGGGC
jct2 BAB2805 AACAGACAAAAAAGATG-AAA
DUPp (+) ATAAAAATAAAAAATATGGAAA
```

Haplotype Structure: *Not Available*

Adapted from Carvalho et al. <sup>5</sup>

# BAB3114

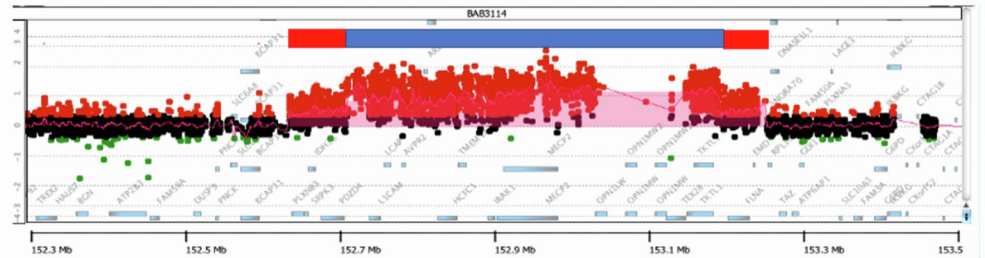

## Breakpoint Junction 2:

chrX:153024486

chrX:153024456 (+) AACAAATGGTATAGGGGAACTTGATATCCACATGCAAAAGAATAAAGTTGGAGGCTGGGCATGGTG  
 Junction 2 CCATCCCCCGCTGCCCTTTTTCTCCTGGCCACATGCAAAAGAATAAAGTTGGAGGCTGGGCATGGTG  
 chrX:153096011 (-) CCATCCCCCGCTGCCCTTTTTCTCCTGGCCGGGTGCGAGGGAGCATGCCCGCGCCTGGCCTCGGCCA  
 chrX:153095984

## Haplotype Structure 1

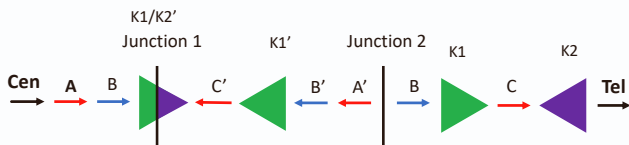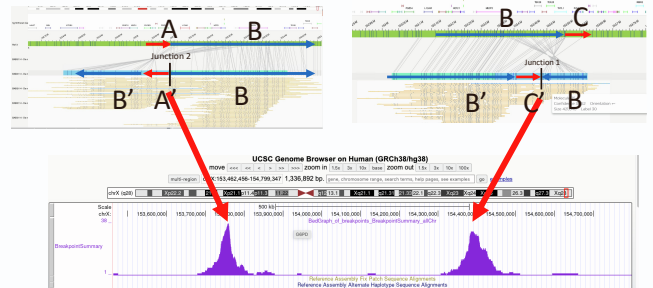

Adapted from Carvalho et al. <sup>5</sup>

# BAB3147

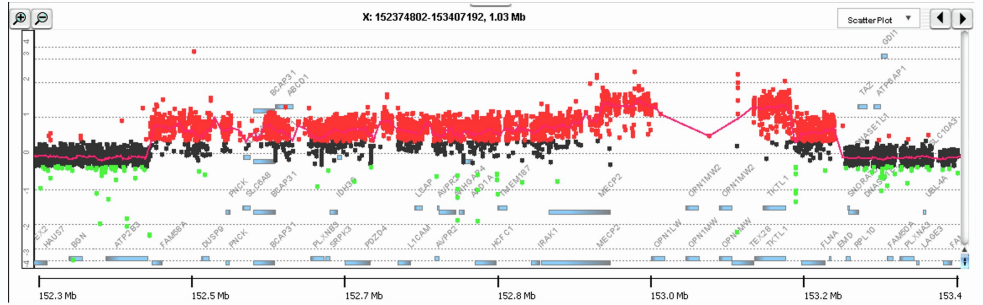

## Breakpoint Junction 2:

chrX:152850819

chrX:152850786 (+) GTTAGGTTCCAGAAGAAATATAGGCACGGAGG**CGTGTTC**TGGCTT**GCAATTCTGTCACCTCAGAGT**  
 Junction 2 **AGGTATAGCCCAC**T**TAGTCAGTTGTGTCTAAG****CGTGTTC**TGGCTT**GCAATTCTGTCACCTCAGAGT**  
 chrX:153353826 (-) **AGGTATAGCCCAC**T**TAGTCAGTTGTGTCTAAG**CACTT**GATGAACCAGTCAATCCAGTCTTCACCT**  
 chrX:153353796

## Haplotype Structure 6:

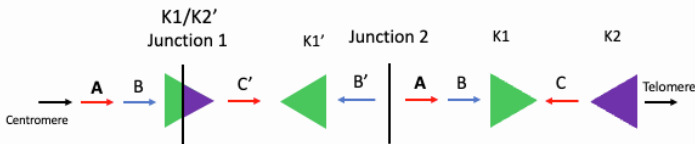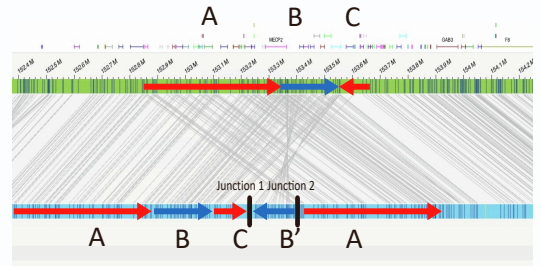

# BAB3216

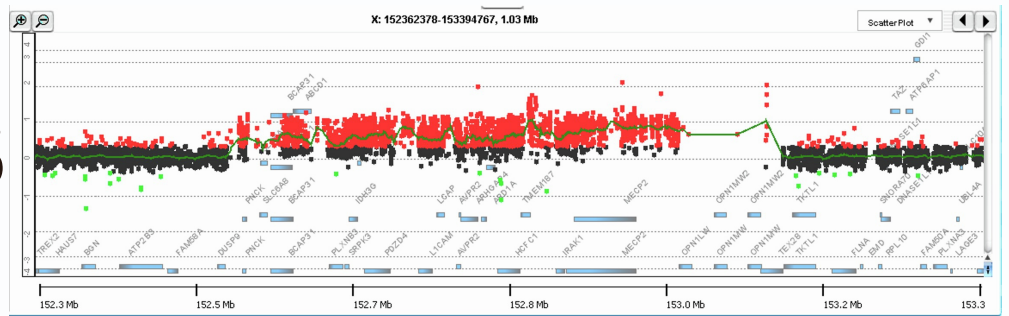

Breakpoint Junction 2:

|                      |                                                                             |
|----------------------|-----------------------------------------------------------------------------|
| R2_intron_TMEM187(-) | CTTTTTTTTTTTTTT <b>AGAC</b> GGAGTCTCACTCTGTTGCCAGGCTAGAGTGCAGTGGC           |
| BAB3216              | C- <b>TTTTTTTTTTTTTT</b> AGACCGATGACTTCTGGCCTCCTT <b>CTGGATGATTGGTGGGCA</b> |
| Intergenic (+)       | TTACTCGTTCTTAGGAC <b>AGAC</b> CGATGACTTCTGGCCTCCTTACACACTGGACCAGCAAC        |
|                      | <br>cis                                                                     |
| Intergenic (+)       | GTGTTCCACTTTTACTCGTTCTTAGGACAGACCGATGACTT <b>CTGGCCTCCTTACACACT</b>         |
| 2R1_intergenic (+)   | ACCAGCAGCTTCTCCCATAGGCTTGAAAGGGCTCGCTCATT <b>CTGGATGATTGGTGGGCA</b>         |

Haplotype Structure: *Not Available*

Adapted from Carvalho et al. <sup>17</sup>



# BAB3255

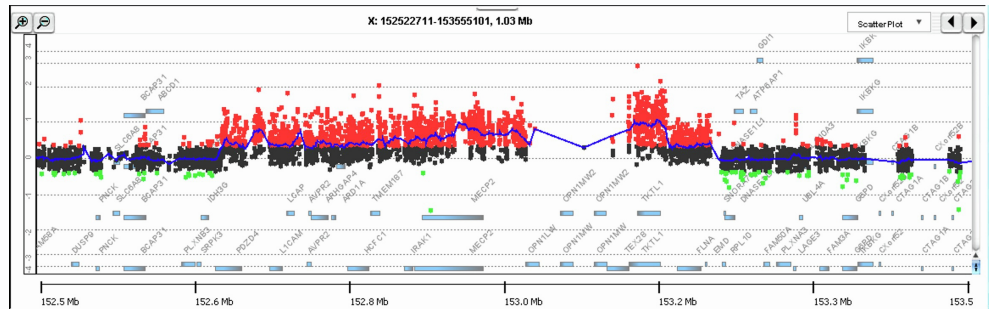

## Breakpoint Junction 2:

chrX:153073620

chrX:153073584 (+) CTCCTCGGCCCTGGGGGTAGATACAACGGGGCGCCTGCTGGAGCCCGGCCAAGGCTAGAGCCTGGAGTTTT

Junction 2 TAAATTTCAACACGAGTTTTGGGGGGACATGTACCCTGCTGGAGCCCGGCCAAGGCTAGAGCCTGGAGTTTT

chrX:153433884 (-) TAAATTTCAACACGAGTTTTGGGGGGACATGTACCCCATAGCAGTATGCTTAACTTTTTAAGAAAGAGGAAGG

chrX:153433851

## Haplotype Structure 3

Or

## Haplotype Structure 1

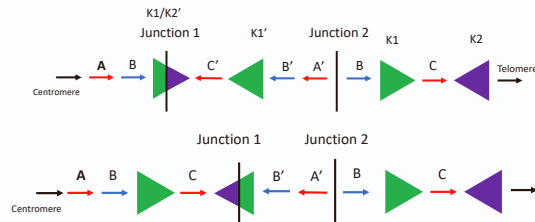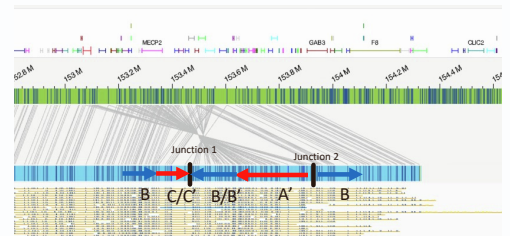

# BAB3274

Breakpoint Junction 2:

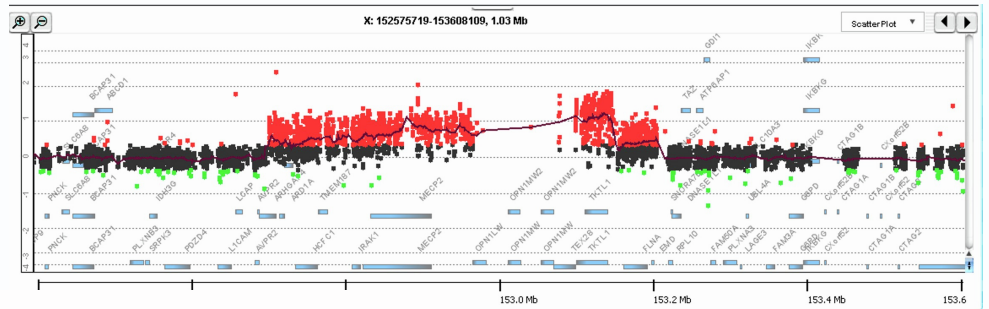

```

OR2_intron_TEX28 (-) GCAGTGAGTCATGATTGCACCACTGCACTCCATTCTGGGTGACAGAGCAAGACCCT
BAB3274/BAB3275   GCAGTGAGTCA-----CACAA-----CAAAACAAGAATACAGACATTTTCA
R1_intron_ARHGAP4 (+) GCCCTGTTTCAAAAACAAACACAACAAAACAAAACAAGAATACAGACATTTTCA
  
```

Haplotype Structure 3

Or

Haplotype Structure 1

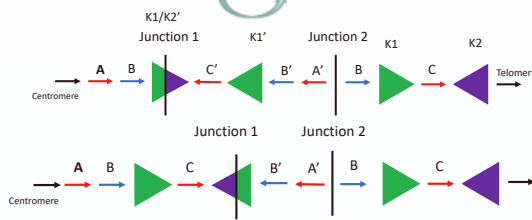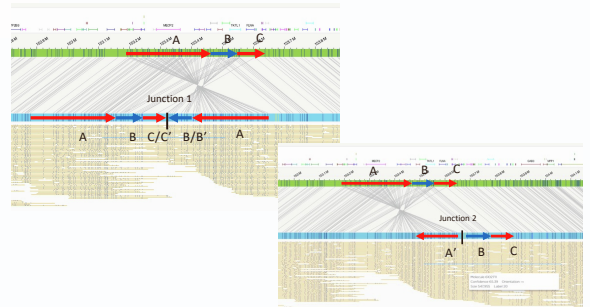

Adapted from Carvalho et al. <sup>17</sup>

# BAB12566

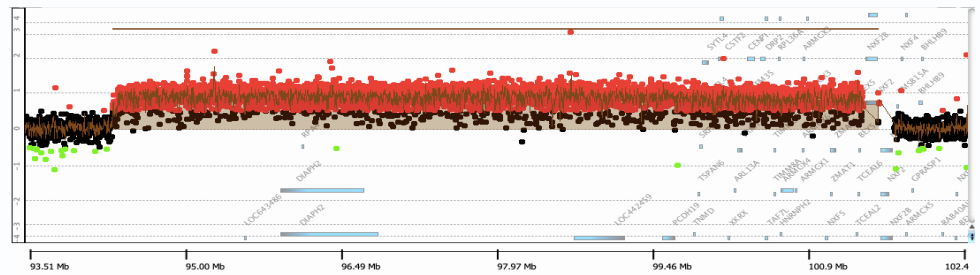

## Breakpoint Junction 2:

chrX:94345302

chrX:94345271 (+) AGAGAATTAAGGACAAAACTGTATGATAATTTCAATTAATGCTGAACAAACATTTAATAGAATTCAGCTTC  
Junction 2 ATATTATCTATAGATAATAGATATTATCTATTTCAATTAATGCTGAACAAACATTTAATAGAATTCAGCTTC  
ChrX:94394842 (-) ATAATATAGATAACAGATATTATCTATCTATATATAATATAGATAACAGATATTATCTATCTATATATAATA

ChrX:94394748

## Haplotype Structure 1:

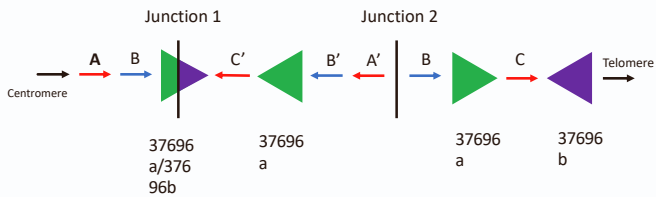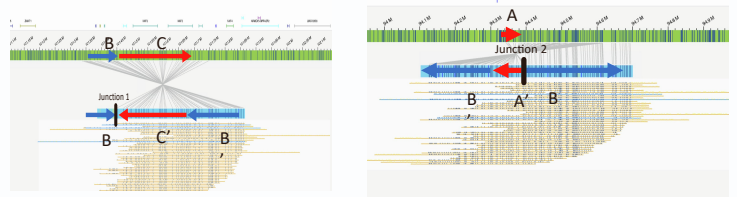

# BAB14392

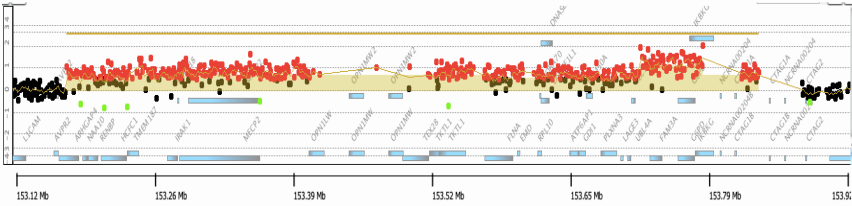

### Breakpoint Junction 2:

chrX:153180013 (+) CGGTGGCATGCGCCTGTAGTCCCAGCTACTTGGGAGGCAGGCAGGGGAATCGCTTGAACCCGGGAGGCGGA  
Junction 2 CACCTCACCTGGCCTCTTTATTTATCAAATACTGAGGCAGGCAGGGGAATCGCTTGAACCCGGGAGGCGGA  
chrX:153722563 (-) CACCTCACCTGGCCTCTTTATTTATCAAATACTGTTTCTGGGCCAGGCACGGTGGCTTATGCCTGTAATCCCA  
chrX:153180047  
chrX:153722603

Haplotype Structure: *Not Available*

# BAB14547

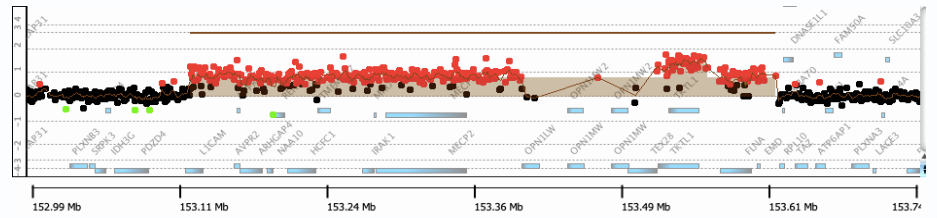

## Breakpoint Junction 2:

chrX:153131049 (+) TCAACCCAAGTCTTCCAGGAGAGCGGCTGGCAGGTGGCAAAGCCCCCTCACCATCCTGTCGCTTTACCTCAGTGATCA  
 Junction 2 CTCACTGCAACCTCTTGGGTTCAAGCGATTCCTCTTGCCAAAGCCCCCTCACCATCCTGTCGCTTTACCTCAGTGATCA  
 chrX:153445956 (-) CTCACTGCAACCTCTTGGGTTCAAGCGATTCCTCTTGCCCTCAGCCTCCCGAGTAGCTGGGATTACAGGCGCCACCACA  
 chrX:153445920

## Haplotype Structure 3:

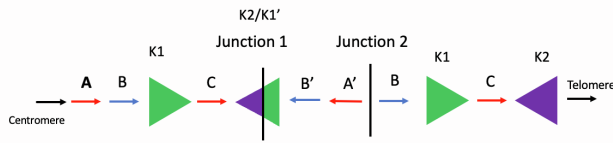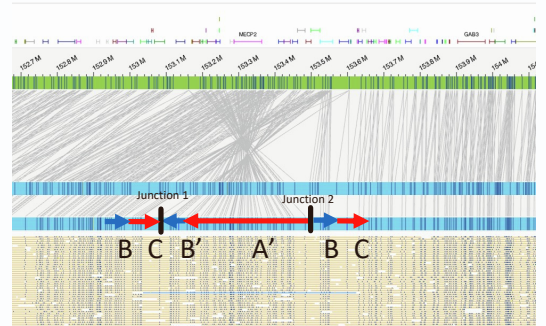

# BAB14604

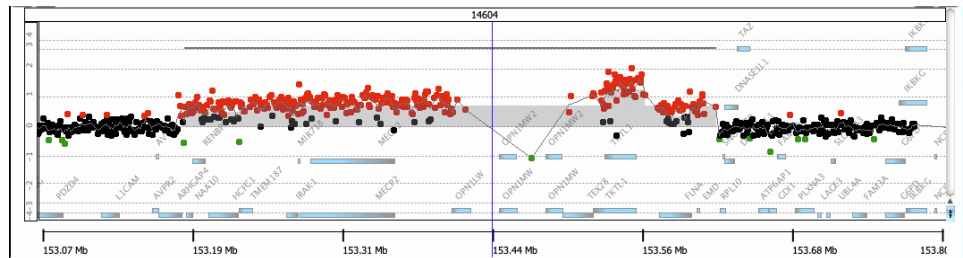

## Breakpoint Junction 2:

chrX:153188686

chrX:152841838 (+) CCAGGTGGCAGCTACTGTGCTAGTCCAGGCAAAA**GACGGCAGGATT**CAGACAAGCAGCAGCGAGGGAGGA  
 Junction 2 **AGGGAGCGCCCTCTCAGAACCCTCCTTAGACCT****GACGGCAGGATT**CAGACCAGCAGCAGCGAGGGAGGA  
 chrX:153078714 (-) **AGGGAGCGCCCTCTCAGAACCCTCCTTAGACCT**GCTTCCTCTCCTCACTTTTCCATTTCCATAGCGC

chrX:153499735

## Haplotype Structure 3:

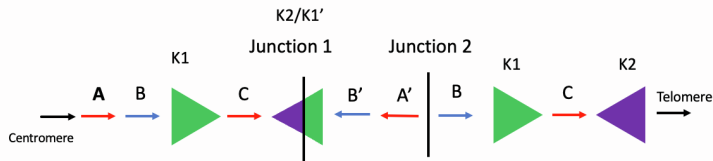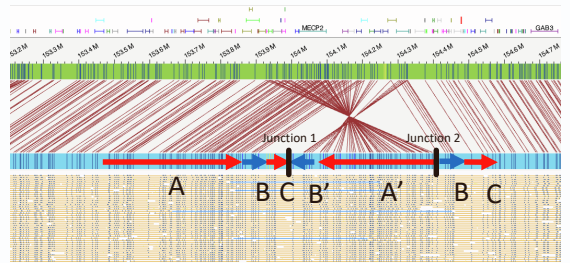

# BAB14686

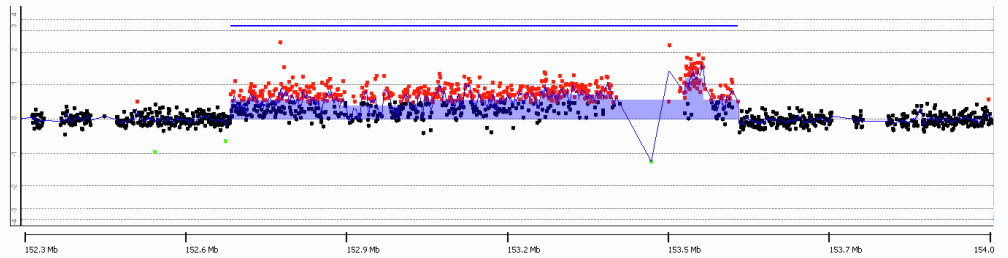

## Breakpoint Junction 2:

chrX:152754451

chrX:152754420 (+) CCTTCCCAACTGGGGAGGCAGGGGACTCGCACTTGGGAAATGTACCTGCGGGCTCTTGGGGTTCGTACCTGGC

Junction 2 GCAGAGCTGGAAGAAGCCAAGAGGTTCCACACTTGGGAAATGTACCTGCGGGCTCTTGGGGTTCGTACCTGGC

chrX:153441231 (-) GCAGAGCTGGAAGAAGCCAAGAGGTTCCACA TCAGCCTCCAGGAGTCCTATCACAGCCTAAAGGAGAGGTCTC

ChrX:153441203

## Haplotype Structure 2:

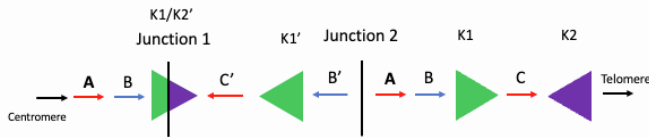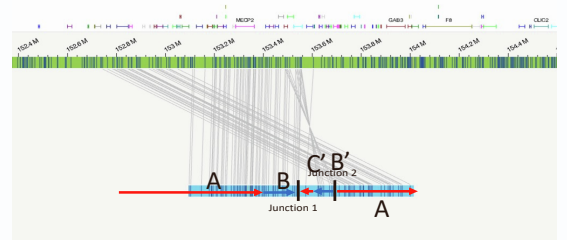



# BAB15418

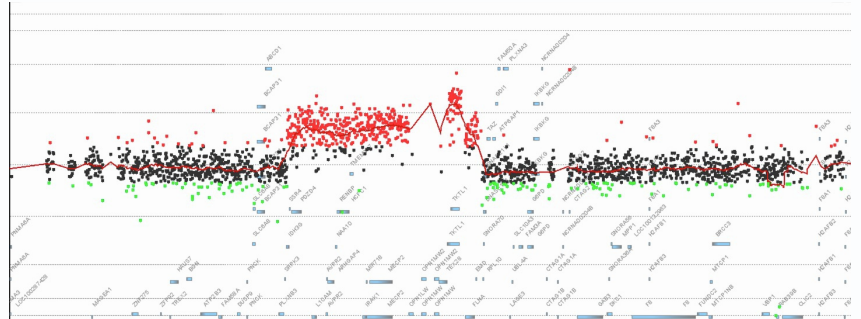

## Breakpoint Junction 2:

chrX:153054892 (+) GGGAGGCTGAGGCAGGAGAATCGCTTGAAACTGGAAGGCAGAGGTTGCACTGAGCCGAGATCACACCGC  
 Junction 2 CTGCCTCAGCCTCTCGAGTATCTGGGACTACTGGAAGGCAGAGGTTGCACTGAGCCGAGATCACACCGC  
 chrX:153413610 (-) CTGCCTCAGCCTCTCGAGTATCTGGGACTACAAGCCGTGCATTACCACAATGGCAATTTTTTTTATTTC  
 chrX:153413582

## Haplotype Structure 4:

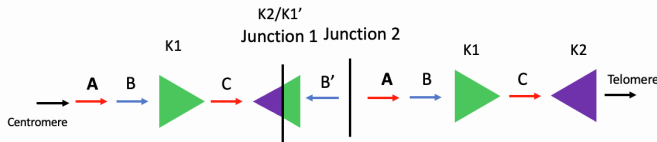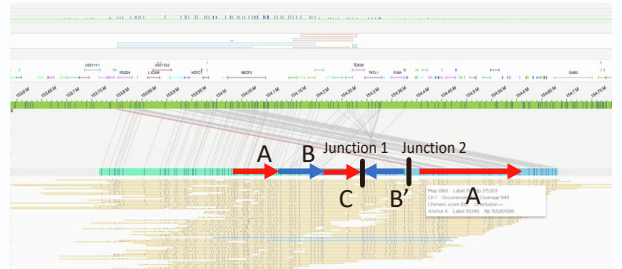

# BAB15428

**Breakpoint Junction 2:**  
Within *Alu* Repetitive Elements

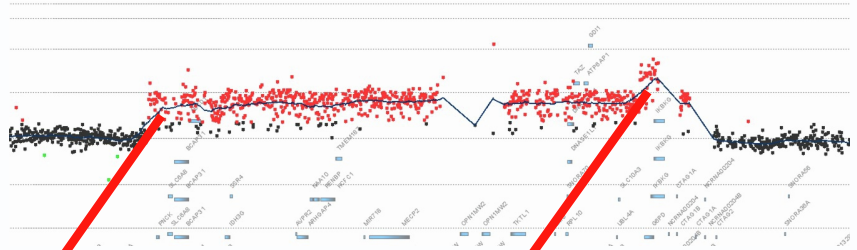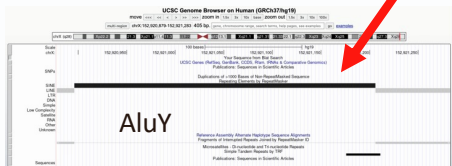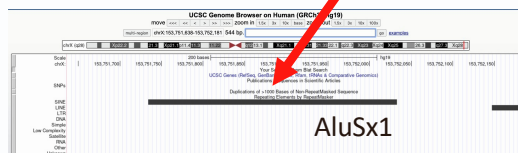

**Haplotype Structure 3/13**

Or

**Haplotype Structure 1**

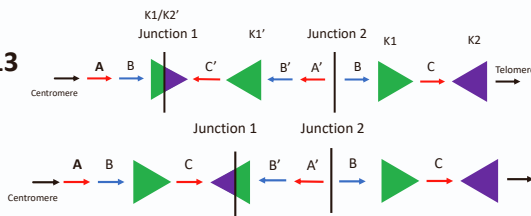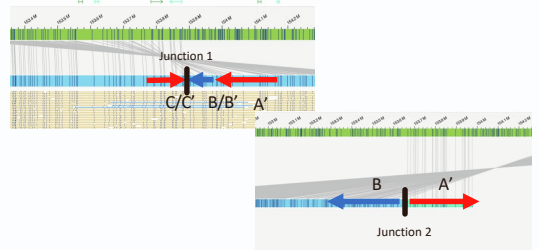

# BAB15702

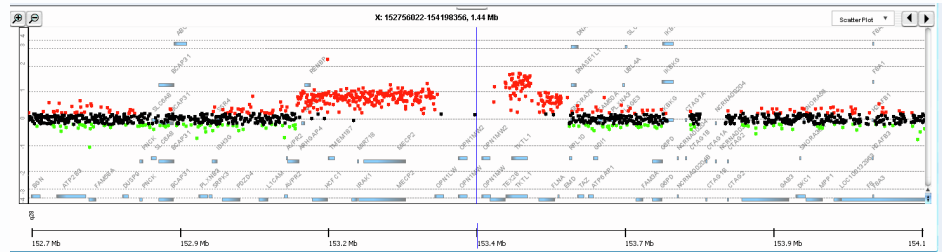

## Breakpoint Junction 2:

ChrX:153187761

chrX:153187715(+) GATCACAGTGCTGCTCAGGGCAAGCCTGCAGCGATCTCGCAGTCTCAGTGGCTGGGGAAGCTGCCCTCAGGCCCCAGGGGAAGG  
 Junction 2 CAATCTCACTCTTGTTCAGTCAGGCTGGAGTGCAGTGGCGCAGTCTCAGTGGCTGGGGAAGCTGCCCTCAGGCCCCAGGGGAAGG  
 chrX:153446662(-) CAATCTCACTCTTGTTCAGTCAGGCTGGAGTGCAGTGGCGCAGTCTCGGGTCACTGCAACCTCCGTCTCCCCGGCTCAAGCAATTCT  
 ChrX:153446626

## Haplotype Structure 6:

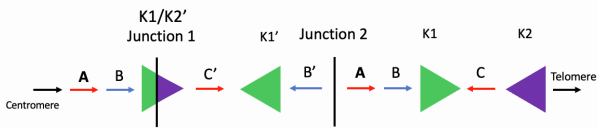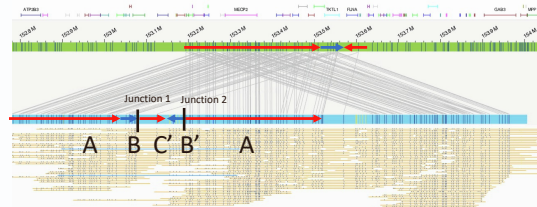

# BAB15705

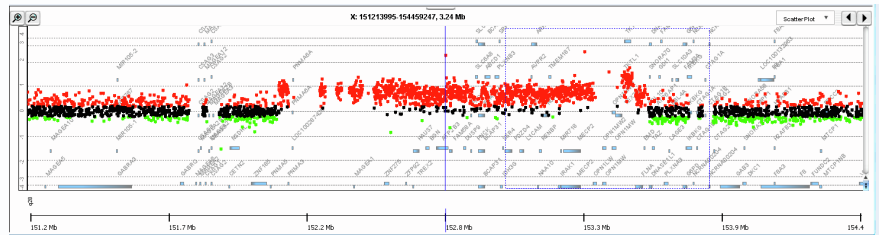

## Breakpoint Junction 2:

chrX:152190603(+) ACACAATCTTCGTCAAATTTAAAGGTGTGGGAGGCTGAGG**CAGGAGAATGGCGTGAACCCGGGAGGCGGAGCTTGCA**  
 Junction 2 **GTGGCACATGCCTGTAGTCCCTGCTACATGGGAGGCTGAGACAGGAGAATGGCGTGAACCCGGGAGGCGGAGCTTGCA**  
 chrX:153431409(-) **GTGGCACATGCCTGTAGTCCCTGCTACATGGGAGGCTGAGACAGGAGGATCGCTTGAGCCCGAGAGTTTTATGTTGCA**  
 ChrX:152190650  
 ChrX:153468511

## Haplotype Structure 2:

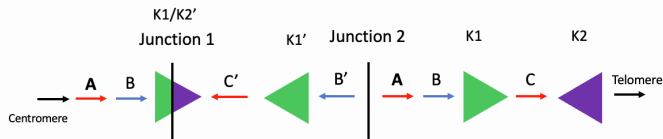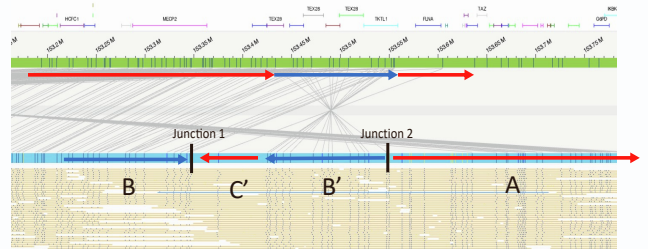

# BAB15740

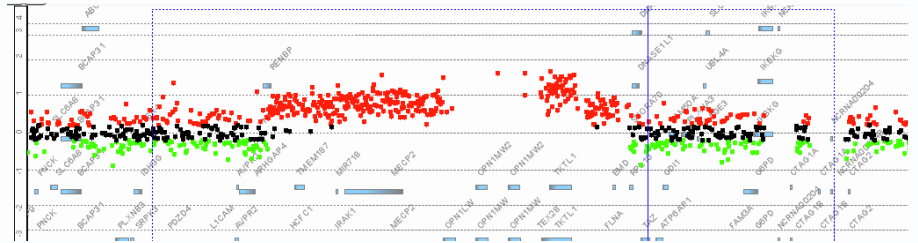

## Breakpoint Junction 2:

ChrX:153205884

ChrX:153205843 (+) CCTGTAGATTCTTGAATAGACACCAGGGCCCCAGACGAATGGCATATATGTCTGAGCATCAGCGTTTCGCCAGCTCCCTGG

Junction 2 TTGTTTACTGACATCTGAAGAGACTCTTCAAGAATGCAC TGGCATATATGTCTGAGCATCAGCGTTTCGCCAGCTCCCTGG

ChrX:153428346 (-) TTGTTTACTGACATCTGAAGAGACTCTTCAAGAATGCAC TGAAGAATATCTTCATGTATCTTTACCAATACATTGATGAAG

ChrX:153428308

## Haplotype Structure 2:

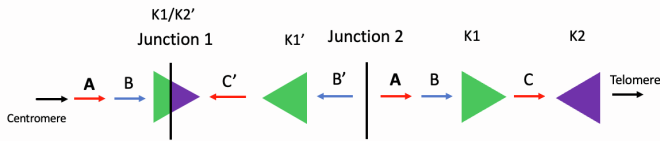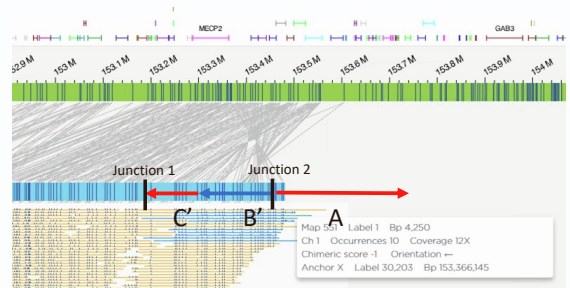

# BAB15789

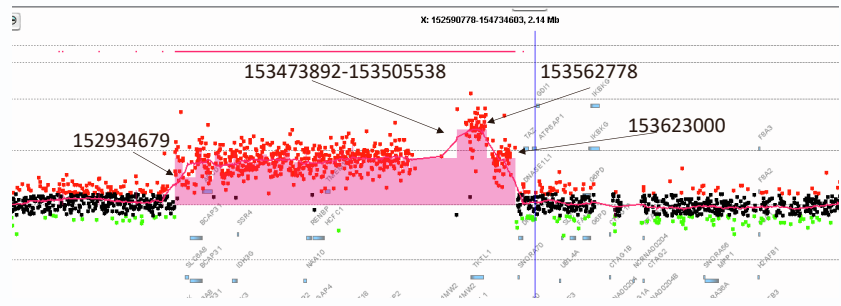

## Breakpoint Junction 2:

ChrX:152934497 (+)

ChrX:152934457 (+) GTTGGTGGGGCTGGGGCCACTCAGACCAGAGGACAGGCC**CACGGCTCTCCACTTCAGAAGCCACCGCCAAGCTGCCACTG**

Junction 2 **TTCAGCCCTGAGTGGAGCACAGCC**TGCCCCAGGCAGAC**CACGGCTCTCCACTTCAGAAGCCACCGCCAAGCTGCCACTG**

ChrX:153421664 (-) **TTCAGCCCTGAGTGGAGCACAGCCGGCCCCAGGCAGACA**TGGCTGCCTCAGGCTGCCCTGGGGGAGTTCTAGAATTG

ChrX:153421627 (-)

## Haplotype Structure 2:

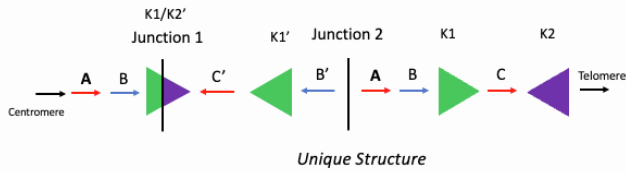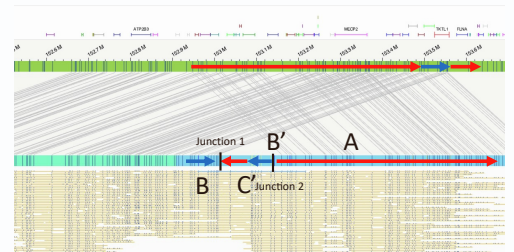

# BAB15421

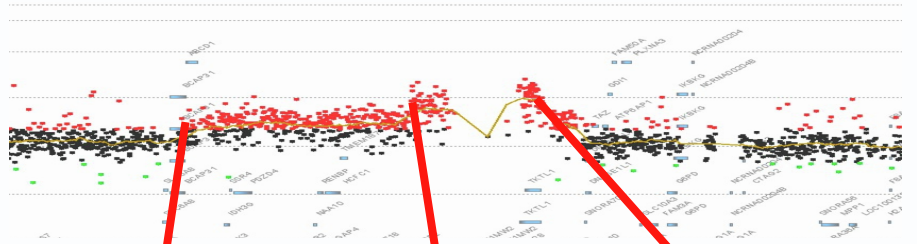

**Breakpoint Junction 2:**  
*Complex Unresolved*

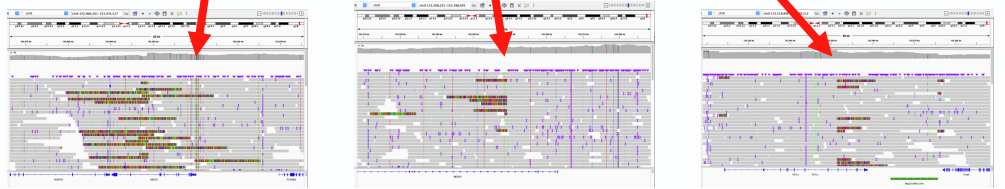

**Haplotype Structure: *Complex Unresolved***

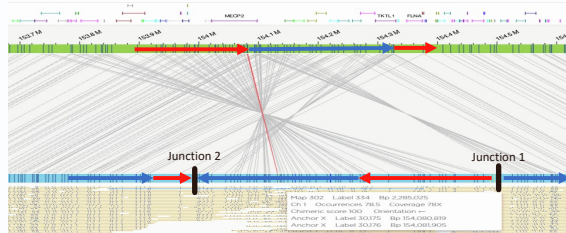



**Data S2: Structural variant haplotype possibilities within a DUP-TRP/INV-DUP event during and interchromosomal and intrachromosomal template switch between inverted LCRs, related to Figure 2.**

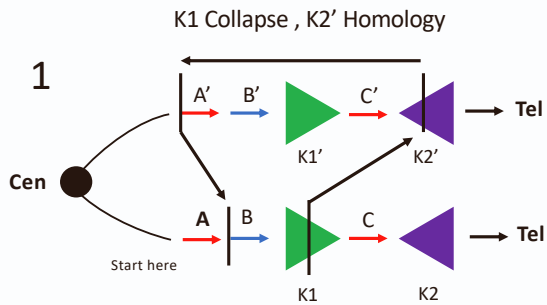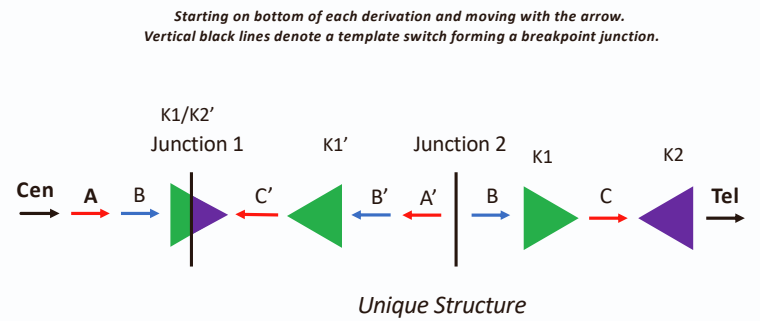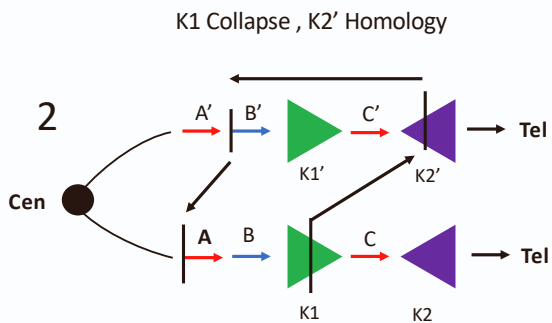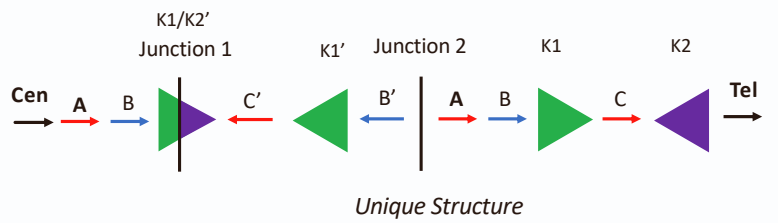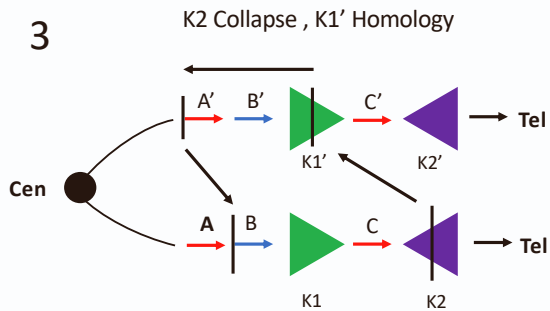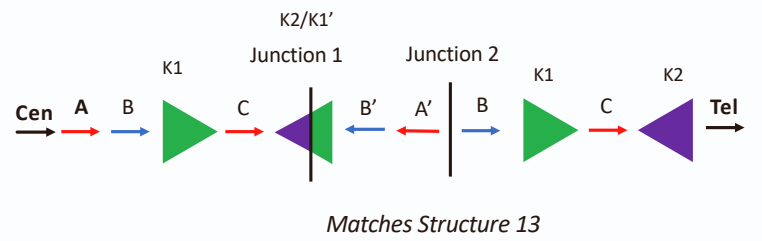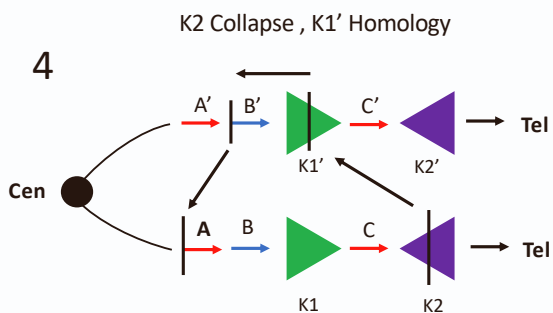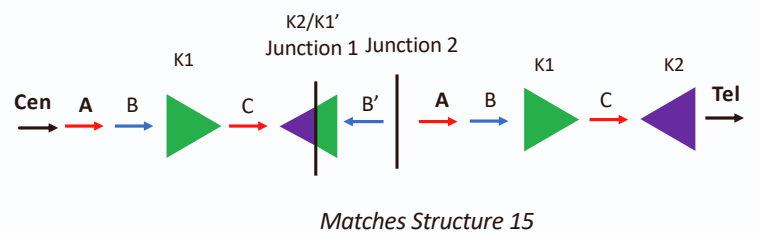

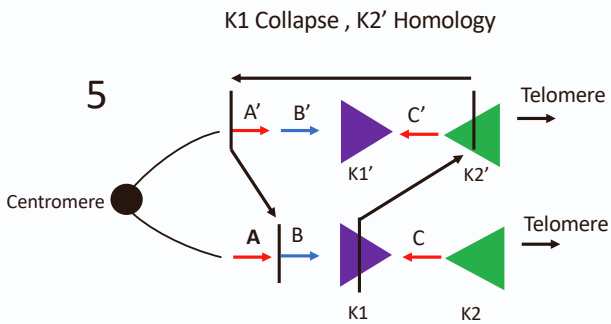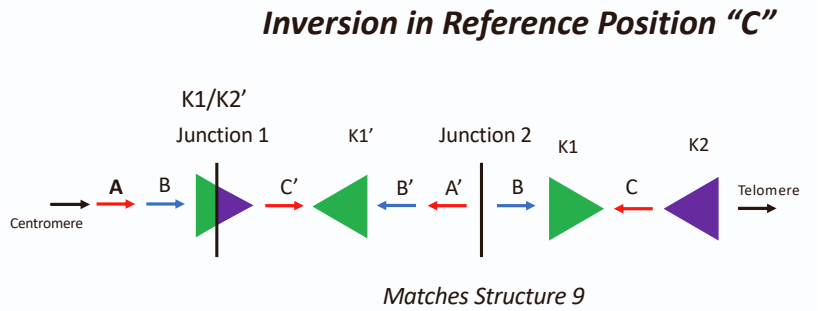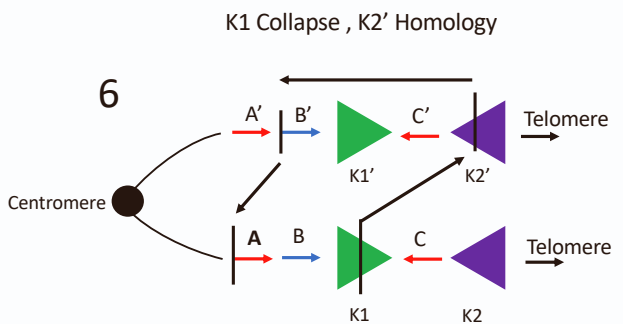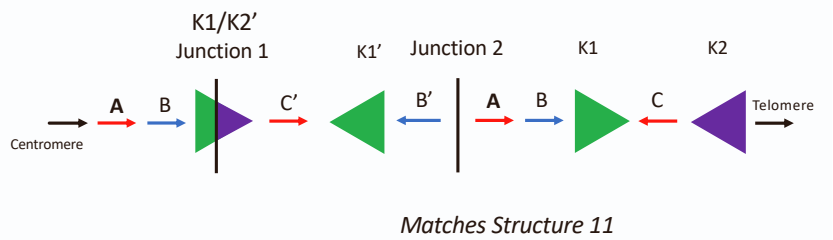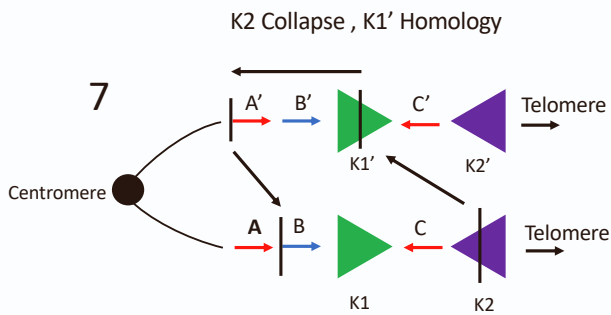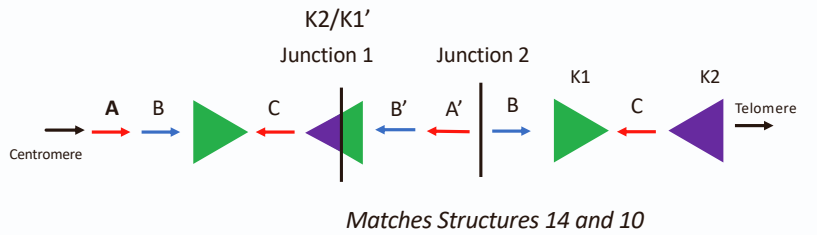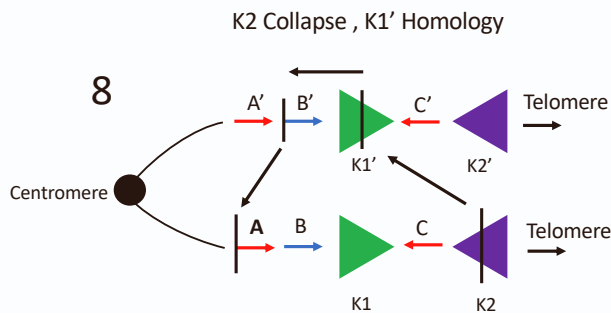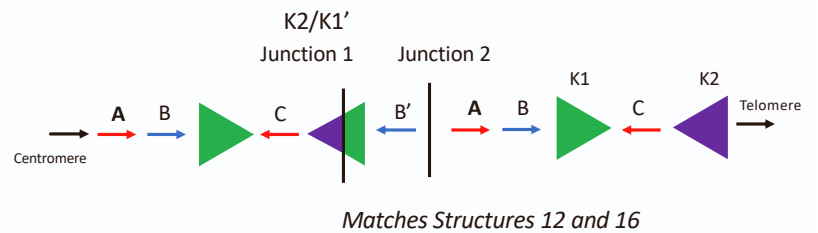

## Interchromosomal Event Mixture of Inversion "C" 1/2

9

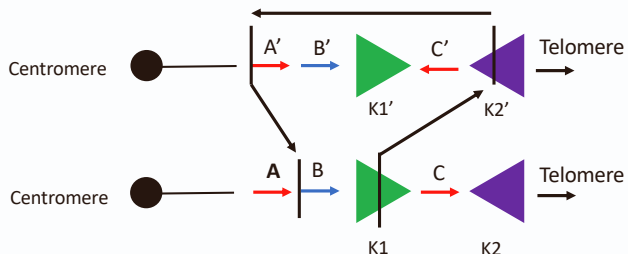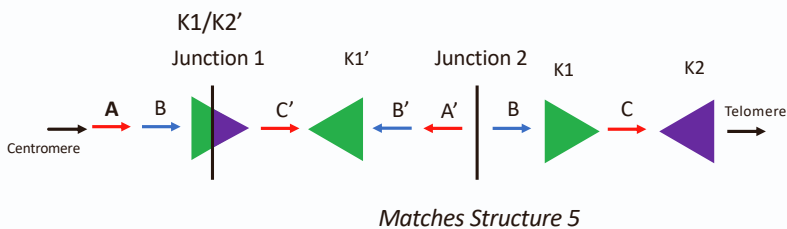

10

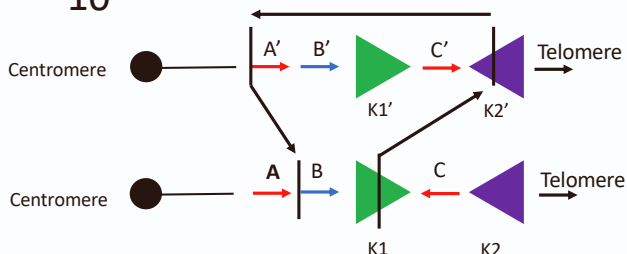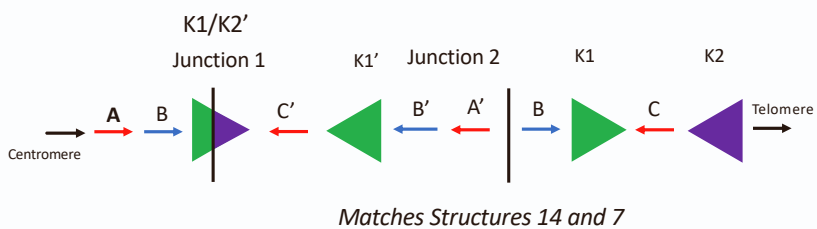

11

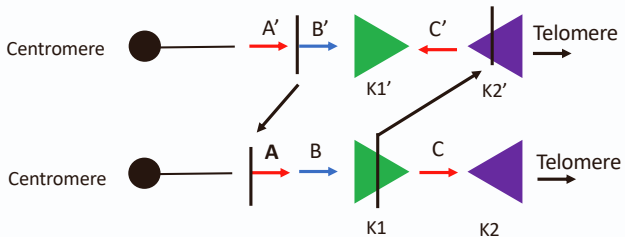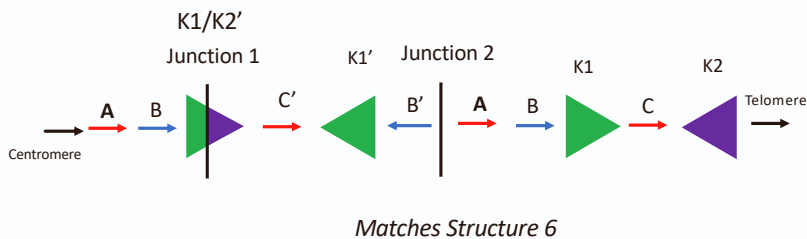

12

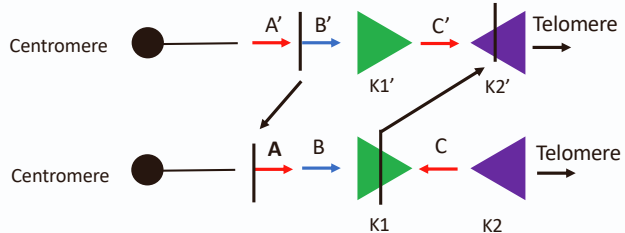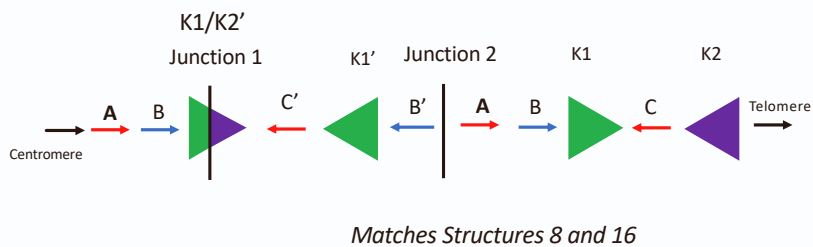

## Interchromosomal Event Mixture of Inversion "C" 2/2

13

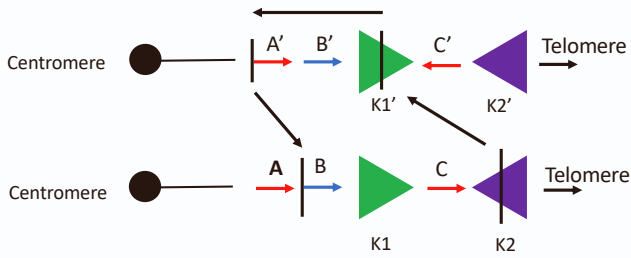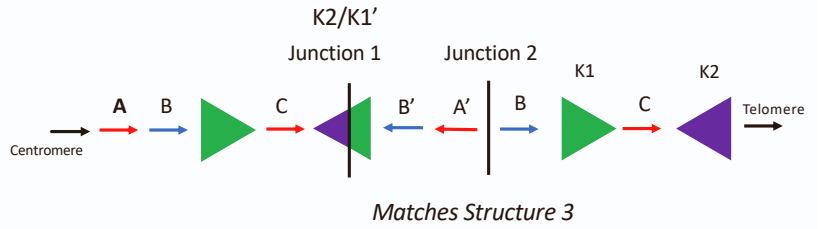

14

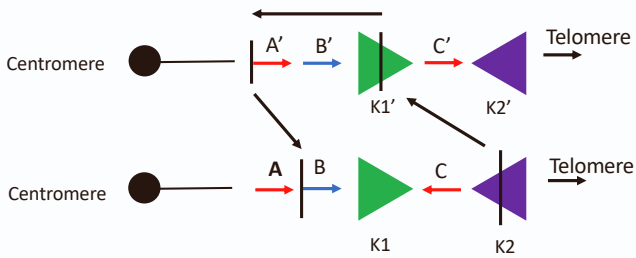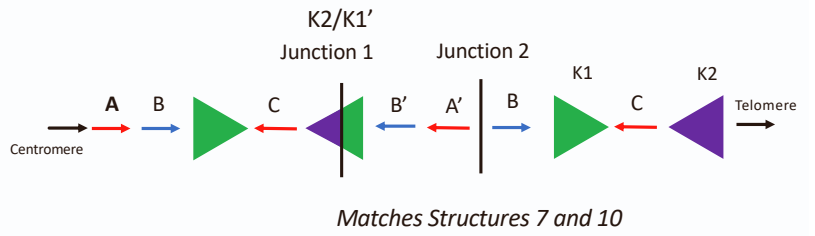

15

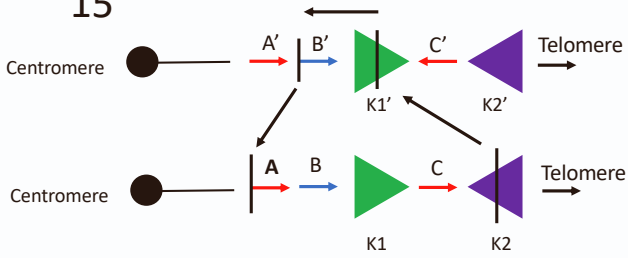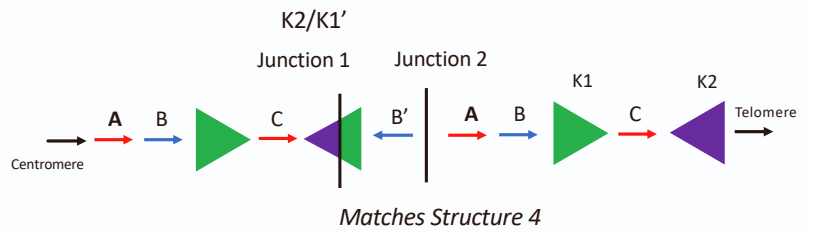

16

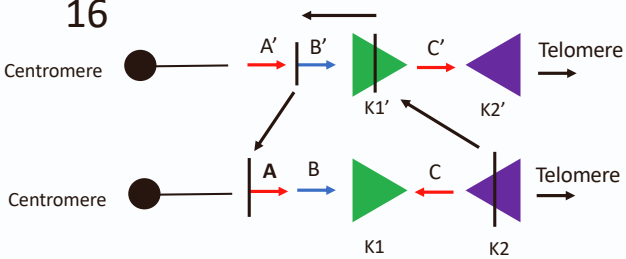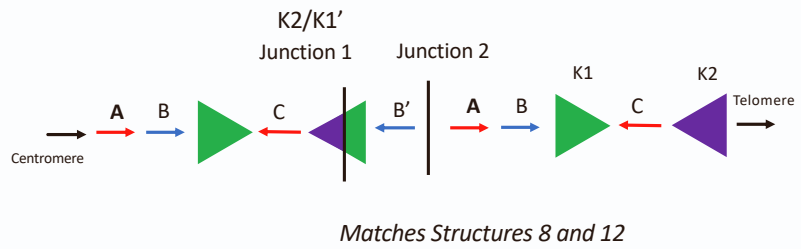

**Data S3: CRISPR-Cas9 targeted ONT data for BAB3114 family, Related to Figure 5.**

## COMPARING THE DUPLICATED FLNA INVERTED REPEATS

Differences between R and L repeats  
(from previous slide)

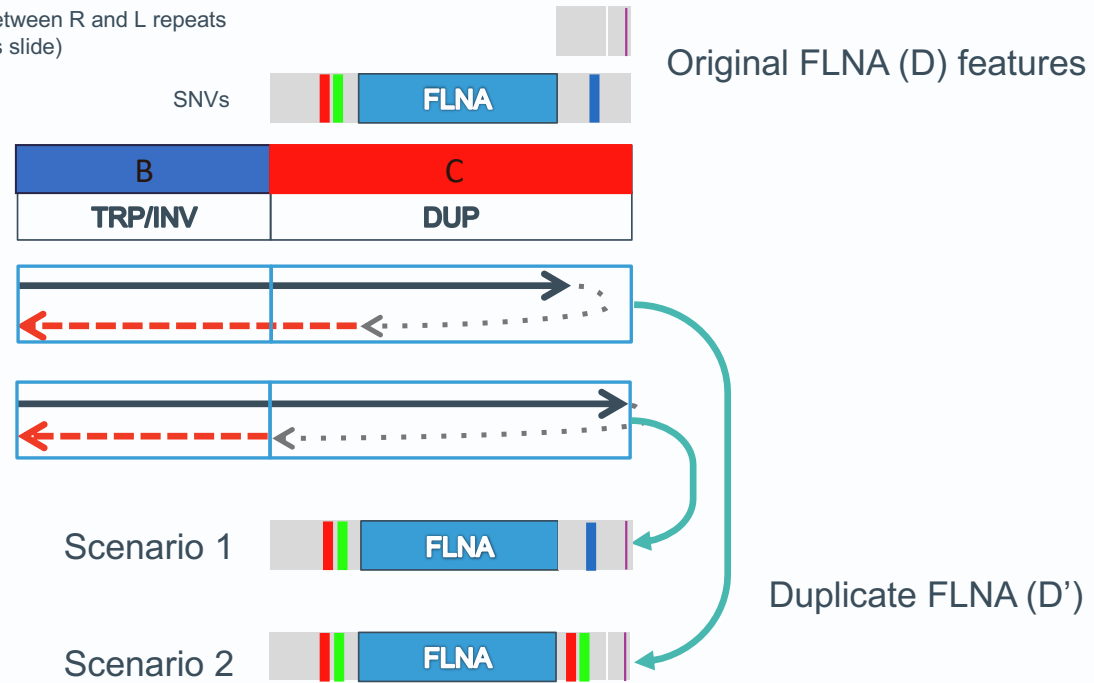

# GENERATE PHASED VARIANTS AND HAPLOTAG

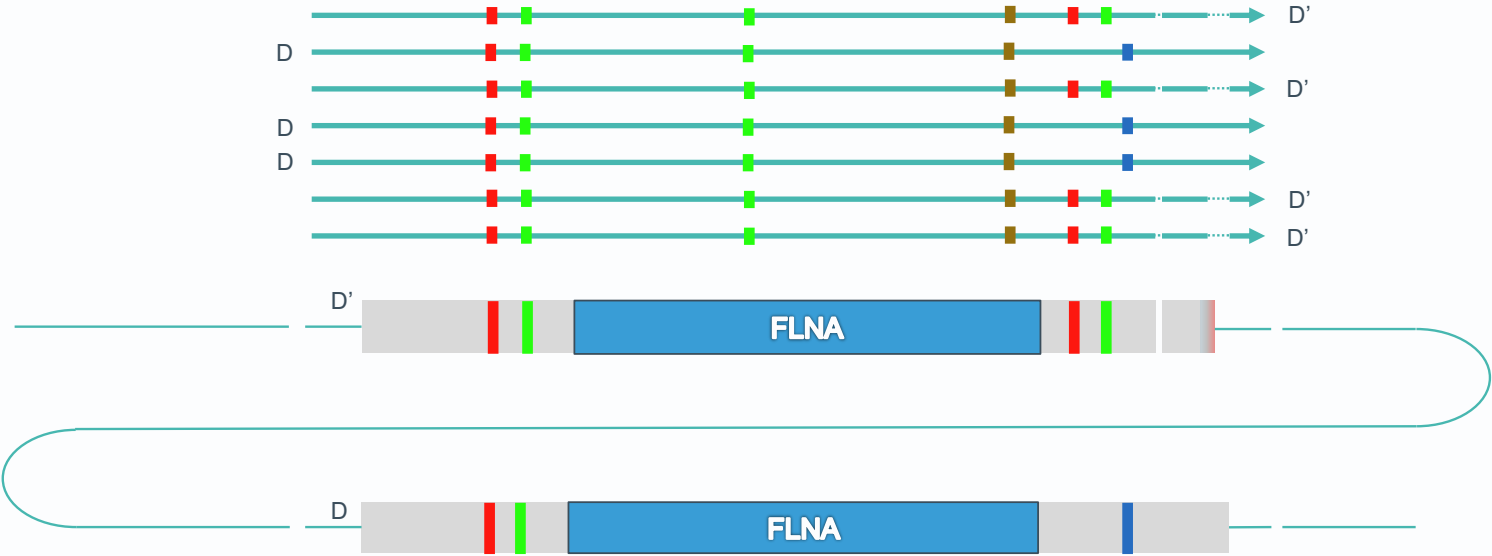



## BAB3114 HAPLOTYPING SEGREGATES READS INTO D AND D'

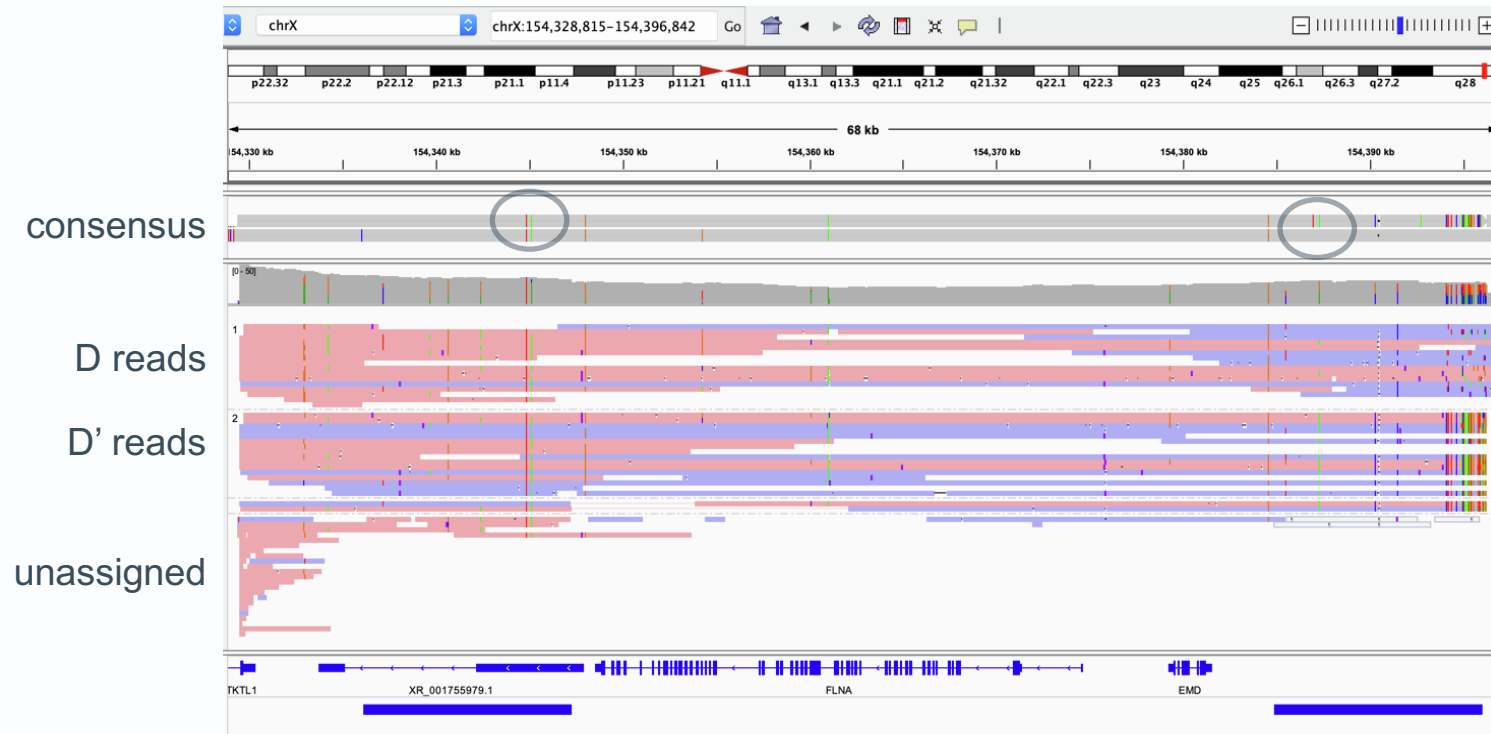

## BREAKPOINT RESOLUTION CONCLUSION

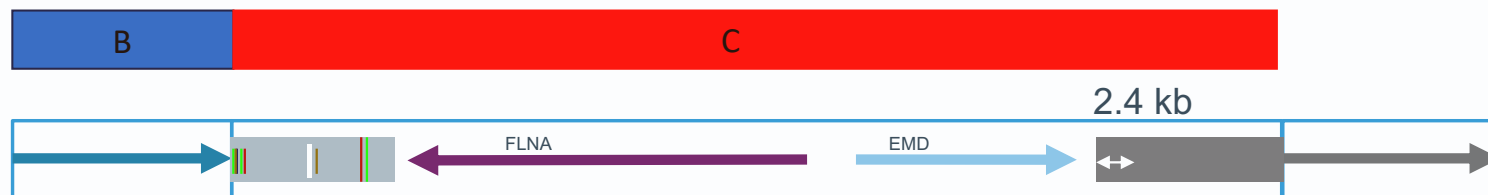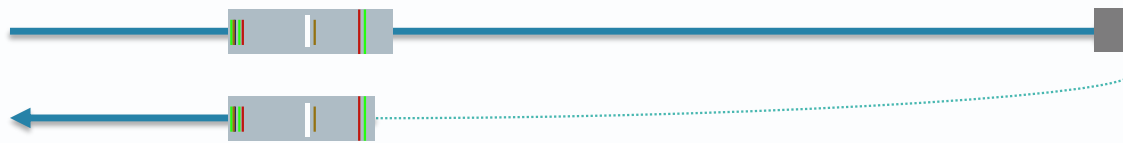

Resulting structure of the D' element:

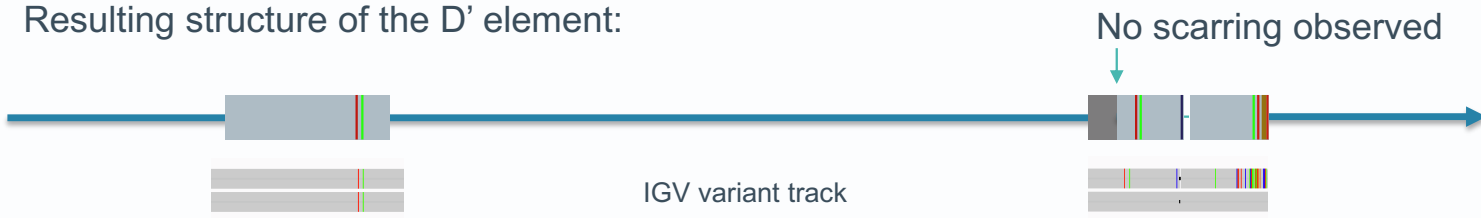

A single 530 kb read resolves opsin cluster allele in BAB3114

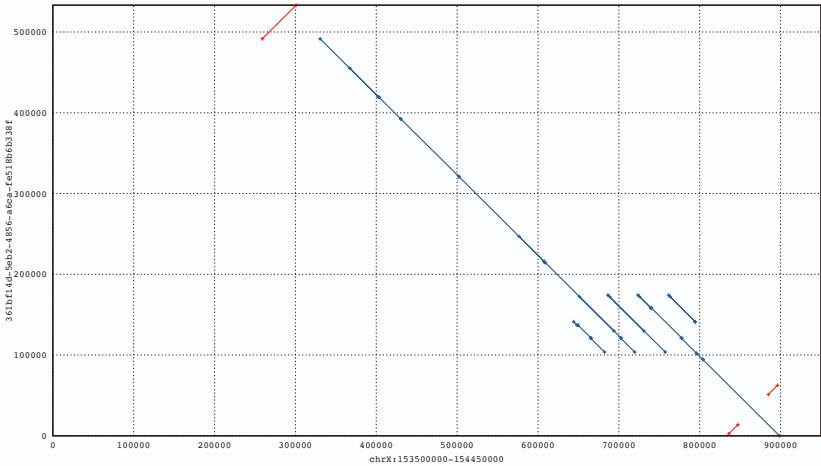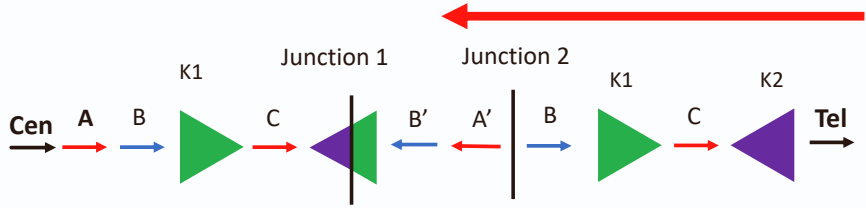

Single 530 kb Nanopore read spanning the region

**Data S4: Strand-Seq data analysis techniques for BAB14547 and BAB3114, related to Table 1.**

## BAB3114

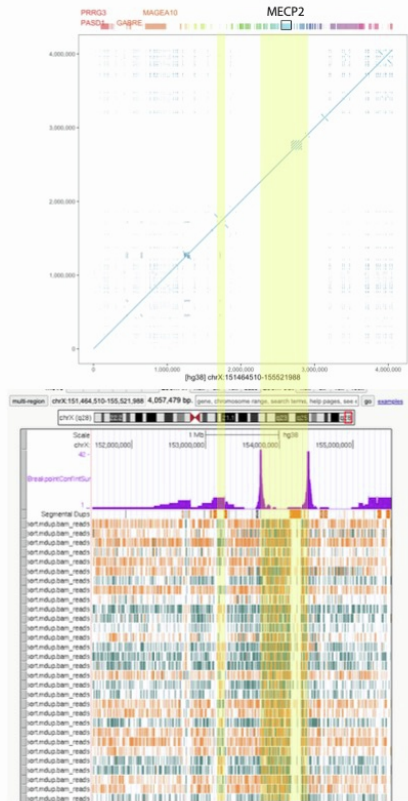

Inv InvDup

## BAB14547

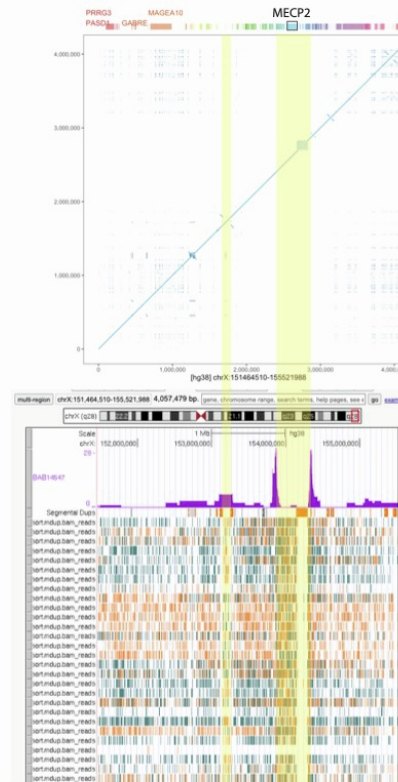

Inv InvDup

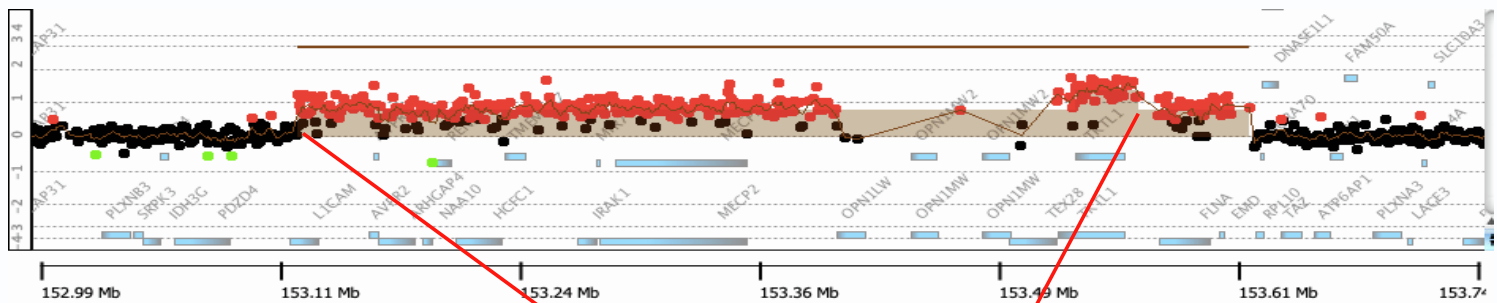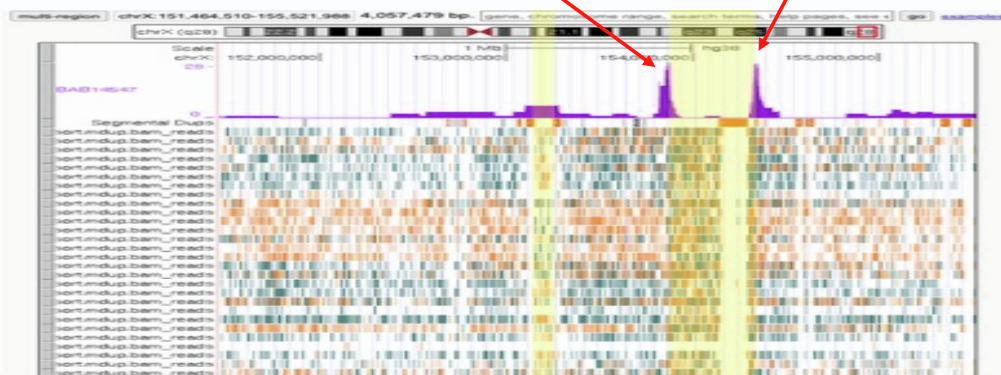

# BAB14547

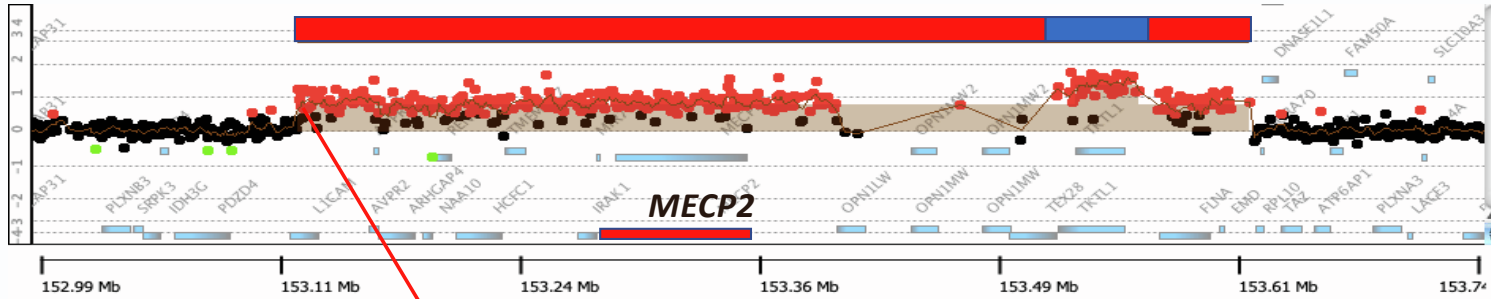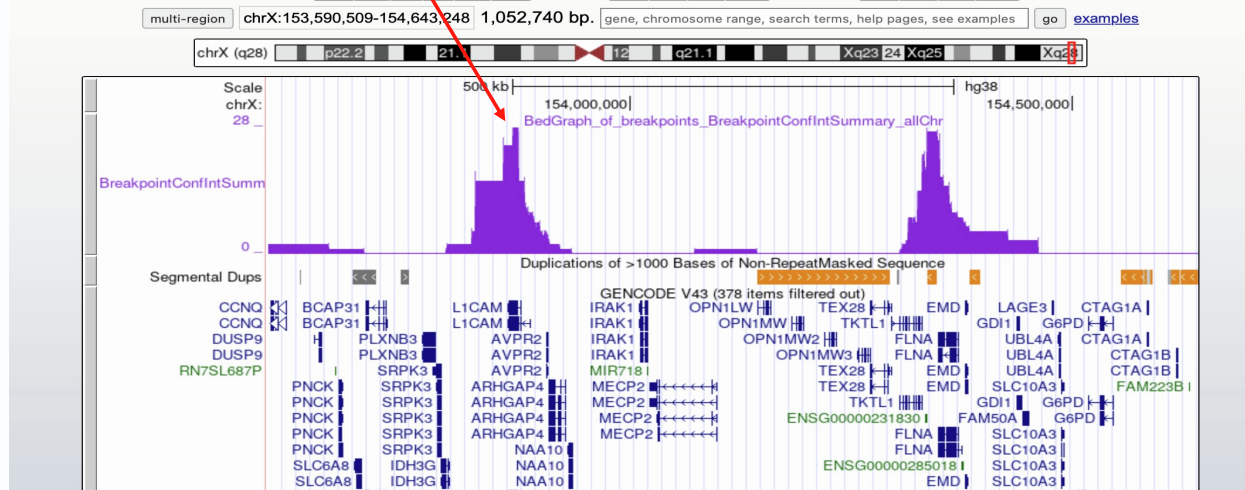

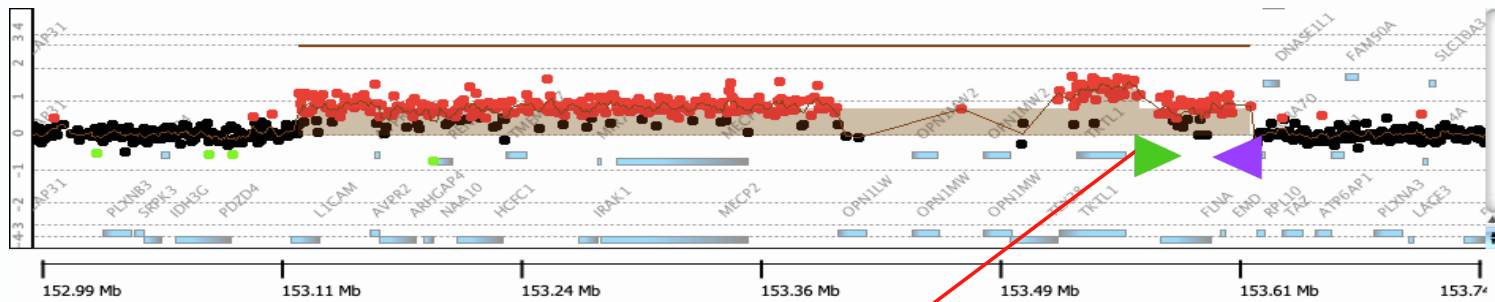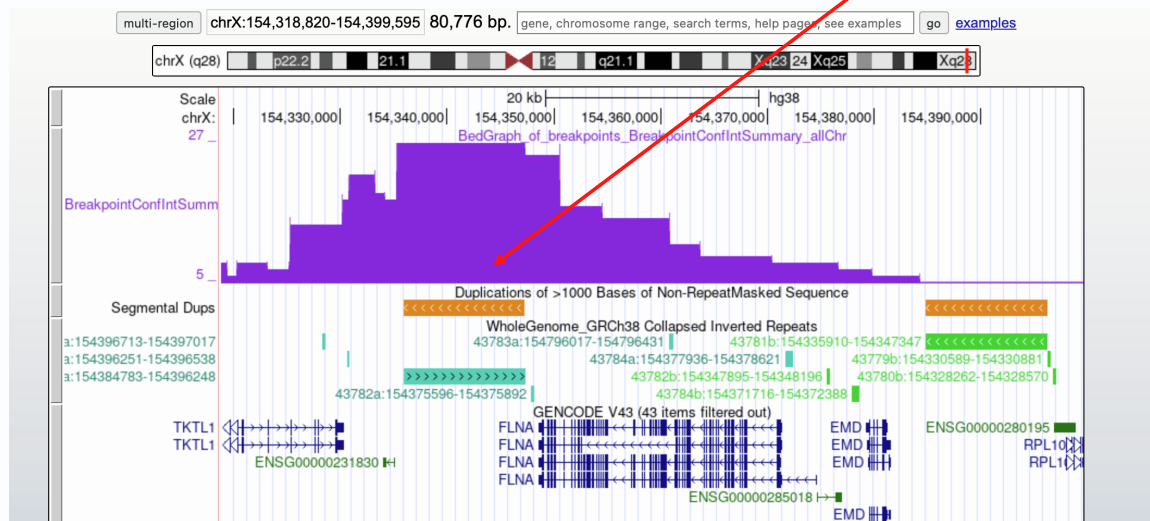

First LCR K1



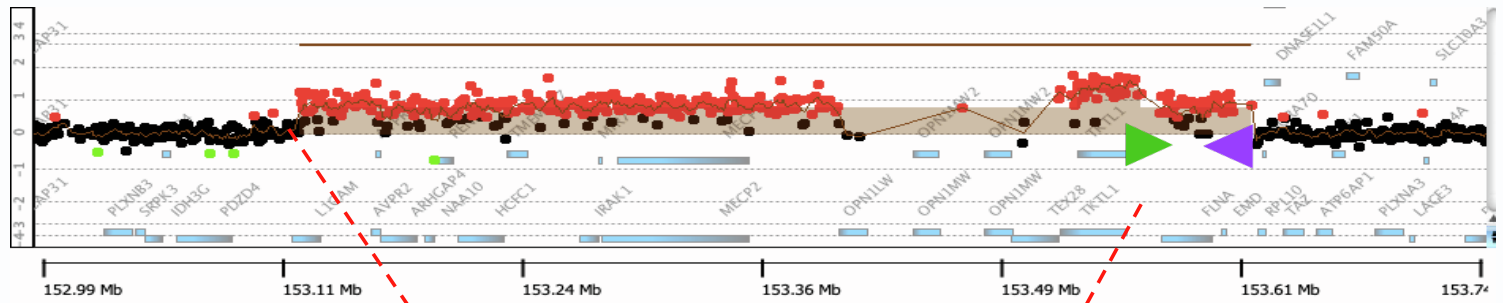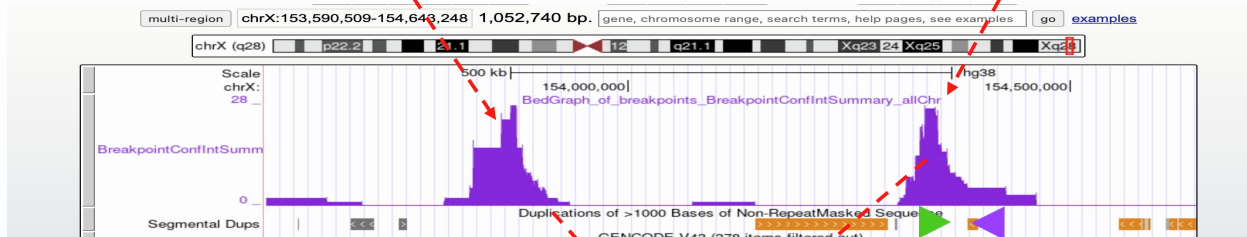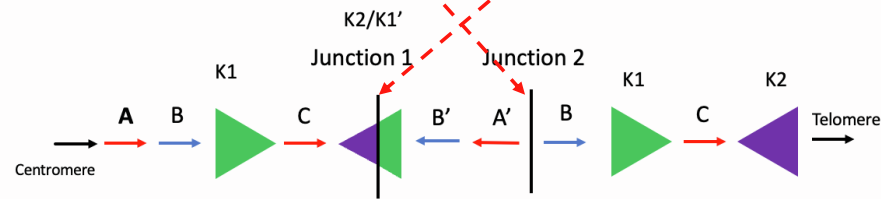

Matches  
Haplotype  
Structure

# BAB3114

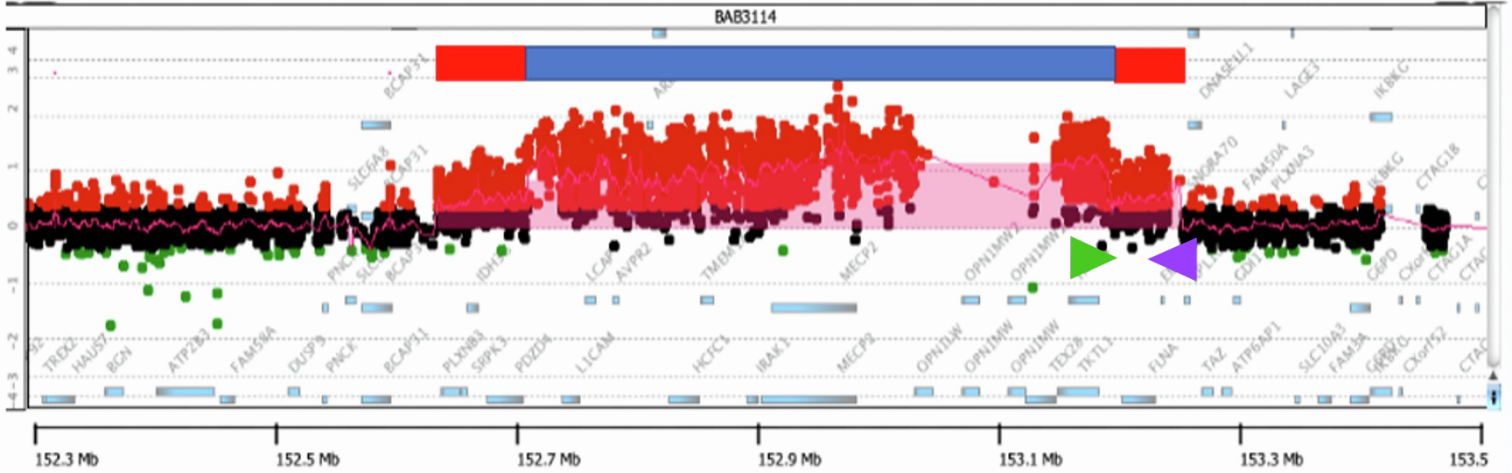

*Array Comparative Genomic Hybridization*

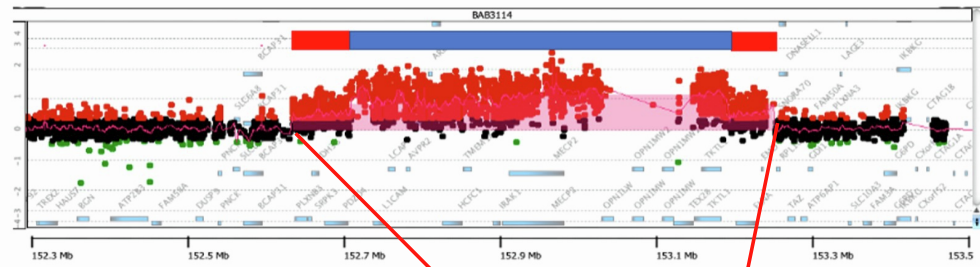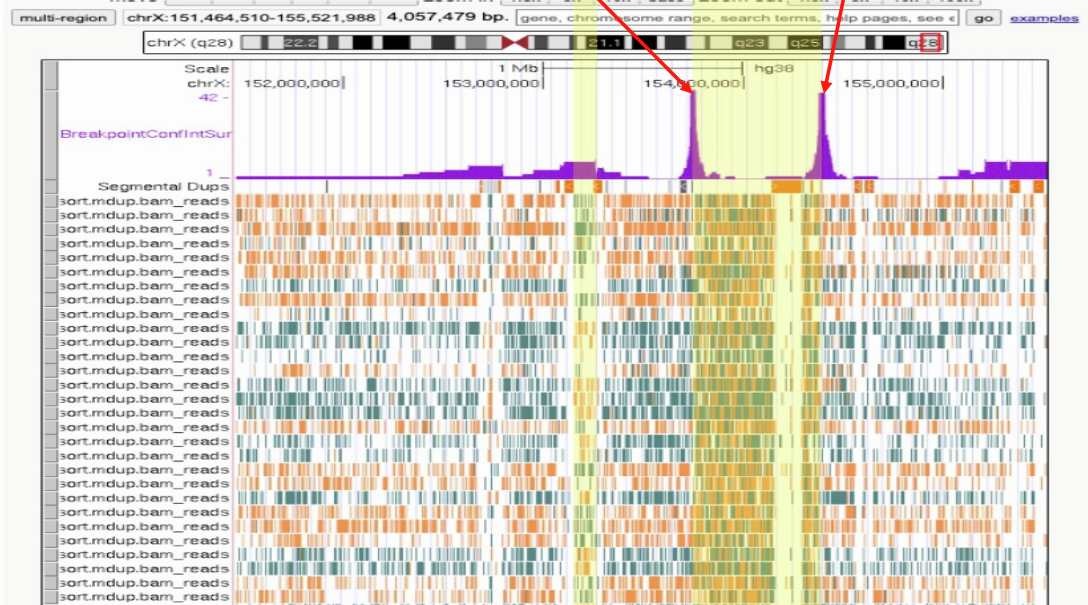

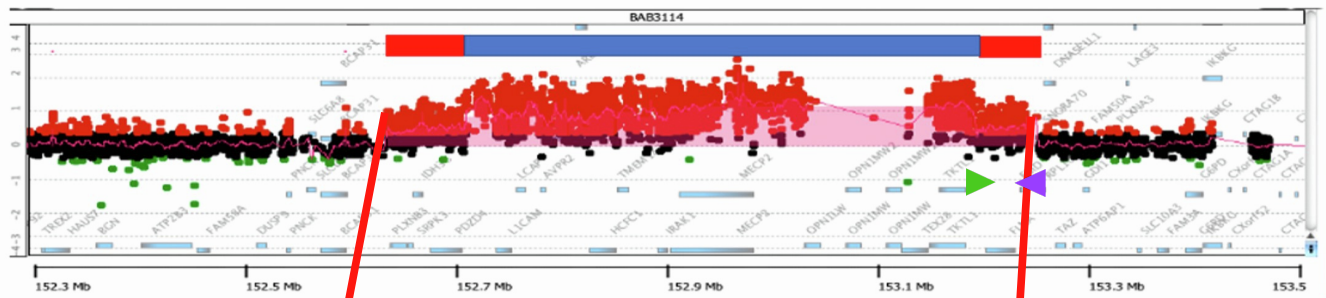

**UCSC Genome Browser on Human (GRCh38/hg38)**

move << < > >> zoom in 1.5x 3x 10x base zoom out 1.5x 3x 10x 100x

multi-region chrX:153,461,456-154,799,347 1,336,892 bp. gene, chromosome range, search terms, help pages, see examples go examples

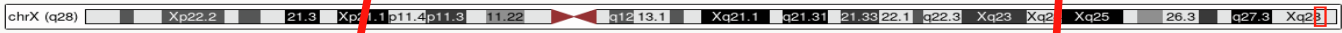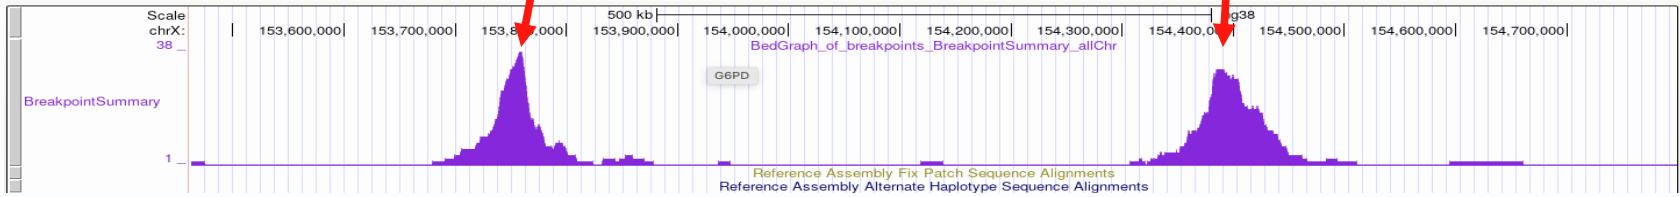

# BAB3114

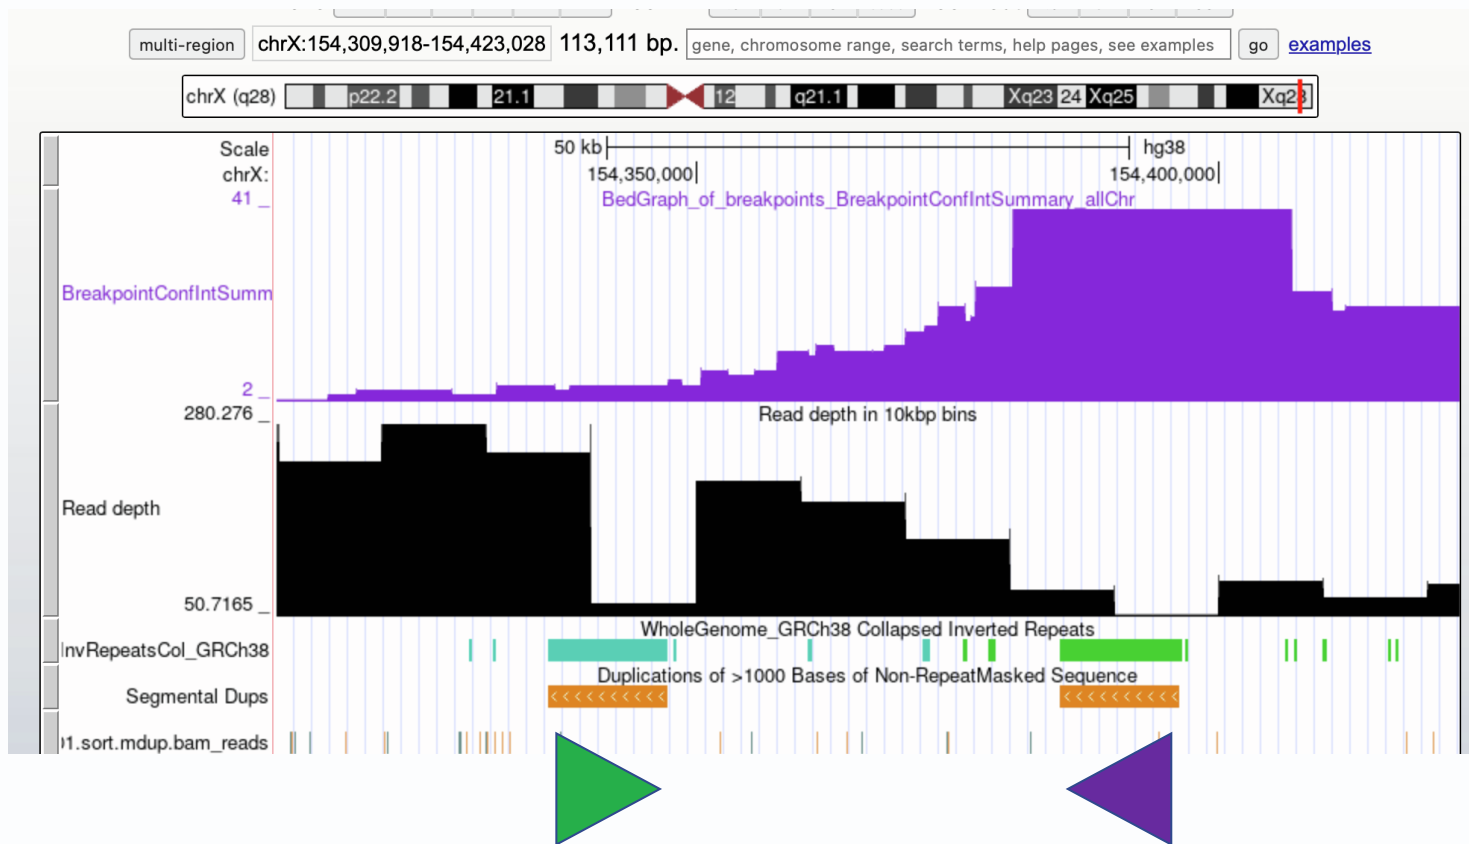

multi-region chrX:154,329,488-154,397,941 68,454 bp. | gene, chromosome range, search terms, help pages, see examples | go [examples](#)

chrX (q28) | p22.2 | 21.1 | 12 | q21.1 | Xq23 24 Xq25 | Xq28

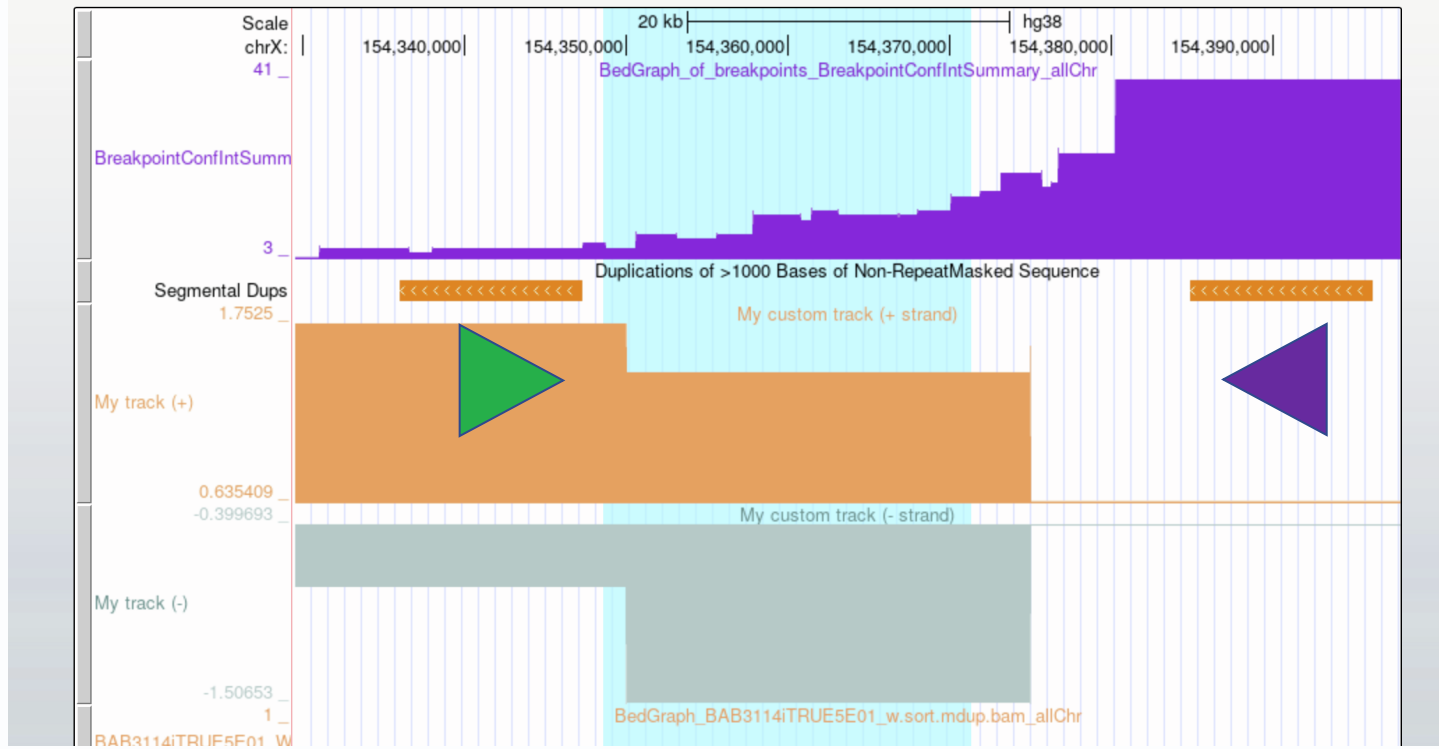

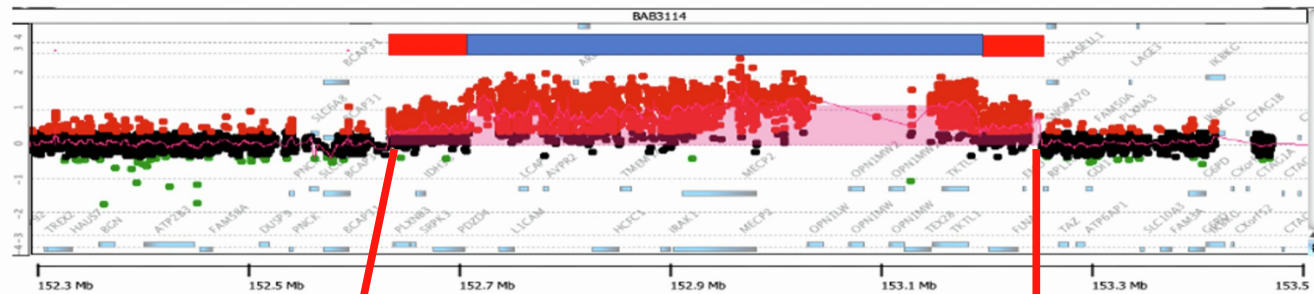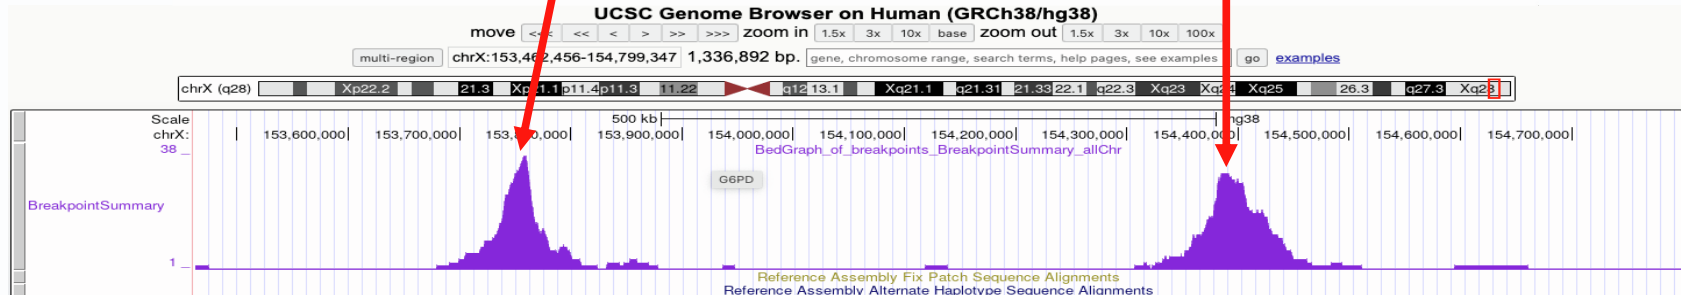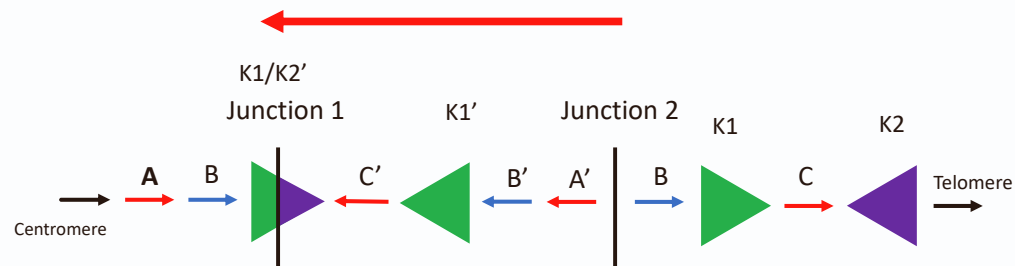

Supplement: mmc1.pdf [file mmc1.pdf]
